1 3D imaging of neuronal inclusions and protein  
2 aggregates in human neurodegeneration by  
3 multiscale X-ray phase-contrast tomography

4 Jakob Reichmann<sup>1†</sup>, Jonas Franz<sup>2,7†</sup>, Marina  
5 Eckermann<sup>3</sup>, Katja Schulz<sup>2</sup>, Brit Mollenhauer<sup>4,5,7,8</sup>, Christine  
6 Stadelmann<sup>2,6,7\*</sup> and Tim Salditt<sup>1,6\*</sup>

7 <sup>1</sup>Institute for X-ray Physics, University of Göttingen,  
8 Friedrich-Hund-Straße 1, Göttingen, 37077, Lower Saxony,  
9 Germany.

10 <sup>2</sup>Department of Neuropathology, Göttingen University Medical  
11 Center, Robert-Koch-Straße 40, Göttingen, 37075, Lower Saxony,  
12 Germany.

13 <sup>3</sup>ESRF, The European Synchrotron Radiation Facility, 71 Av.  
14 des Martyrs, Grenoble, 38000, Auvergne-Rhône-Alpes, France.

15 <sup>4</sup>Paracelsus-Elena-Klinik, Klinikstraße 16, Kassel, 34128, Hesse,  
16 Germany.

17 <sup>5</sup>Department of Neurology, Göttingen University Medical Center,  
18 Robert-Koch-Straße 40, Göttingen, 37075, Lower Saxony,  
19 Germany.

20 <sup>6</sup>Cluster of Excellence “Multiscale Bioimaging: from Molecular  
21 Machines to Networks of Excitable Cells” (MBExC), University  
22 of Göttingen, Göttingen, Lower Saxony, Germany.

23 <sup>7</sup>Aligning Science Across Parkinson’s (ASAP) Collaborative  
24 Research Network, Chevy Chase, 20815, MD, USA.

25 <sup>8</sup>Scientific employee with an honorary contract at Deutsches  
26 Zentrum für Neurodegenerative Erkrankungen (DZNE),  
27 Göttingen, 37075, Lower Saxony, Germany.

28 \*Corresponding author(s). E-mail(s):  
29 [cstadelmann@med.uni-goettingen.de](mailto:cstadelmann@med.uni-goettingen.de); [tsaldit@gwdg.de](mailto:tsaldit@gwdg.de);

30 †Jonas Franz and Jakob Reichmann contributed equally to this  
31 work. \*Christine Stadelmann and Tim Salditt contributed  
32 equally to this work and share last authorship.

### 33 Abstract

34 This study leverages X-ray phase-contrast tomography for detailed anal-  
35 ysis of neurodegenerative diseases focusing on the 3D visualization  
36 and quantification of neuropathological features within fixed human  
37 postmortem tissue. X-ray phase-contrast tomography with synchrotron  
38 radiation offers micrometer and even sub-micron resolution, enabling us  
39 to examine intra- and extraneuronal aggregates and inclusions such as  
40 Lewy bodies, granulovacuolar degeneration, Hirano bodies, neurofibril-  
41 lary tangles,  $\beta$ -amyloid plaques and vascular amyloid deposits in three  
42 dimensions (3D). In the reconstructions, we identified the highest elec-  
43 tron densities in Hirano bodies and Lewy bodies while neurofibrillary tan-  
44 gles exhibit only slight alterations in X-ray phase-contrast tomography  
45 contrast. Using cutting edge high-resolution X-ray synchrotron beamlines  
46 we are now able to even detect subcellular differences of electron den-  
47 sities found in granulovacuolar degeneration. Small scale inhomogeneities  
48 of the electron density are also detected in Lewy bodies potentially  
49 relating to inclusions of organelles. Additionally, we reveal a peculiar  
50 3D geometry of Hirano bodies and demonstrate the co-occurrence with  
51 granulovacuolar degeneration in the same neuron. Utilizing X-ray phase-  
52 contrast tomography in a complementary fashion to traditional technolo-  
53 gies, a quantitative, systematic and disease-overarching understanding  
54 of inclusions and aggregates in neurodegeneration can be achieved.

55 **Keywords:** neurodegeneration; X-ray phase-contrast tomography;  
56 nano-imaging; holotomography; neuroimaging; Lewy bodies; Hirano bodies;  
57 granulovacuolar degeneration; neurofibrillary tangles; amyloid plaques

## 58 1 Introduction

59 Neurodegenerative diseases are characterized by specific cellular and extra-  
60 cellular protein aggregates. Studying their three-dimensional (3D) subcellular  
61 localization and their structural composition is crucial to gain further insights  
62 into the underlying pathological processes. Alzheimer's disease (AD) and  
63 Parkinson's disease (PD) are the most prevalent neurodegenerative dis-  
64 eases, and both are characterized by intraneuronal aggregates consisting of  
65 hyperphosphorylated tau in AD and  $\alpha$ -Synuclein in PD. To date, the compre-  
66 hensive visualization and quantitative assessment of these neuronal aggregates,  
67 alongside extracellular  $\beta$ -amyloid plaques ( $\beta$ -APs) or co-occurring cerebral  
68 amyloid angiopathy (CAA) within a three-dimensional histological context has  
69 remained technologically challenging. For AD as well as PD but also for rarer

70 diseases, e.g., progressive supranuclear palsy, a description of stages and of  
71 spreading of protein aggregates across the brain is in use to diagnose and esti-  
72 mate the neuropathological involvement [1–9]. These staging systems have to  
73 take into account the complex and folded 3D architecture of the brain with its  
74 fiber connections but usually rely on sliced two dimensional planes. In addition,  
75 the frequent coexistence of neurodegenerative pathologies in approximately  
76 50% of either AD or PD cases underscores the need for a method enabling  
77 a quantitative 3D assessment of pathological aggregates and inclusions at  
78 subcellular resolution with comparable quality to conventional histology [1, 10].  
79 This gap between demand and capability of 3D histological imaging has  
80 recently been narrowed by X-ray phase-contrast tomography (XPCT). As a  
81 non-destructive X-ray technique it offers high penetration, scalable resolution,  
82 and sufficient contrast for unstained native, liquid- or paraffin-embedded  
83 tissue [11–13]. Based on high spatial coherence of synchrotron radiation (SR)  
84 and even laboratory  $\mu$ -focus sources, XPCT exploits phase contrast arising  
85 from free space wave propagation, and applicability for studies of neurodegen-  
86 erative diseases has been demonstrated both for animal models as well as for  
87 human tissue, from autopsy or biopsy. For AD models in mice, for example,  
88 XPCT allowed the quantification of cellular aging [14] and the assessment of  
89 plaque morphology [15, 16] in mouse cerebellum [17, 18]. Further, XPCT was  
90 used to track neuronal loss, blood-brain barrier damage, and inflammatory  
91 cell infiltration in an experimental autoimmune encephalomyelitis (EAE)  
92 model [19–21]. Beyond animal models, investigation of biopsies of human ner-  
93 vous tissue by XPCT [22] - also denoted as virtual histology - was used in [23]  
94 to resolve sub- $\mu m$  structures in the cerebellum, with notable changes in the  
95 cytoarchitecture observed for multiple sclerosis [24]. In [25], correlative imag-  
96 ing of XPCT and conventional histology was used to investigate AD-related  
97 pathologies of the hippocampal cornu ammonis 1 (CA1) region, further  
98 investigated in [26], where we found an unexpected chromatin compaction  
99 of granule cells of the dentate gyrus. On a larger scale, imaging of an entire  
100 liquid-embedded human brain was recently demonstrated, with the possibility  
101 to zoom in at certain areas of interest with voxel sizes down to 1  $\mu m$  [27].  
102

103 In this work, we implemented a multi-scale XPCT approach combining paral-  
104 lel and cone beam illumination with highly coherent 3rd and 4th generation  
105 synchrotron beams to cover a wide range of scales and to achieve high qual-  
106 ity reconstruction of human CNS tissue, based on optimized optics, phase  
107 retrieval and reconstruction. We started out with scanning of larger volumes of  
108 paraffin-embedded tissue, fully compatible with conventional neuropathology  
109 workflows, to capture regions of interest identified, e.g. by immunohistochem-  
110 istry. High-resolution zoom tomography was then used to study these areas in  
111 their native three-dimensional context, focusing on intraneuronal (e.g., Lewy  
112 bodies (LBs), granulovacuolar degeneration (GvD), Hirano bodies (HBs), neu-  
113 rofibrillary tangles (NFTs) and extraneuronal aggregates ( $\beta$ -amyloid plaques  
114 ( $\beta$ -APs) and vascular amyloid deposits). In a label-free approach exploiting

115 the contrast given by varying electron densities in human tissue, we identified  
116 hallmark features of neurodegenerative pathologies, enabling both qualitative  
117 and quantitative analyses. This technique allows for three-dimensional explo-  
118 ration and comparison of electron densities across different pathologies, with  
119 the potential to enable insights into their generation and evolution. Further,  
120 having the 3D reconstructions obtained by non-destructive XPCT at hand,  
121 we then carried out proof-of-concept correlative immunopathological inves-  
122 tigations. Thereby, we are able to compare electron densities of hallmark  
123 pathologies using the unique contrast mechanism of XPCT based on electron  
124 density variations in tissue. Note that for biological tissues, the electron density  
125 is in good approximation proportional to mass density. Hence, the 3D recon-  
126 structions provide important constraints for modeling biomolecular packing in  
127 aggregates and inclusions.



## 128 2 Results

129 Postmortem formalin fixed and paraffin embedded (FFPE) brain tissue from  
130 patients with neuropathologically confirmed AD (n=2), PD (n=1) and CAA  
131 (n=1) was selected for synchrotron radiation (SR) measurements. Regions of  
132 interest were identified by co-immunohistochemistry for hyperphosphorylated  
133 tau and  $\beta$ -amyloid in the CA1 region for AD patients. Temporal isocortex was  
134 assessed in CAA, whereas substantia nigra was examined in the PD patient  
135 (for patient details, see Table 1). Full 3D tomograms of tissue punches of 1 mm  
136 diameter from the respective regions of interest (see Fig.1 for an overview of  
137 the experimental approach) were recorded using two different configurations:  
138 the SR1-setup, a parallel beam configuration at DESY, Hamburg, for imaging  
139 overviews, and the SR2-setup, a cone beam configuration at ESRF, Grenoble,  
140 for high-resolution investigations (see methods and supplementary information  
141 for detailed experimental setup).

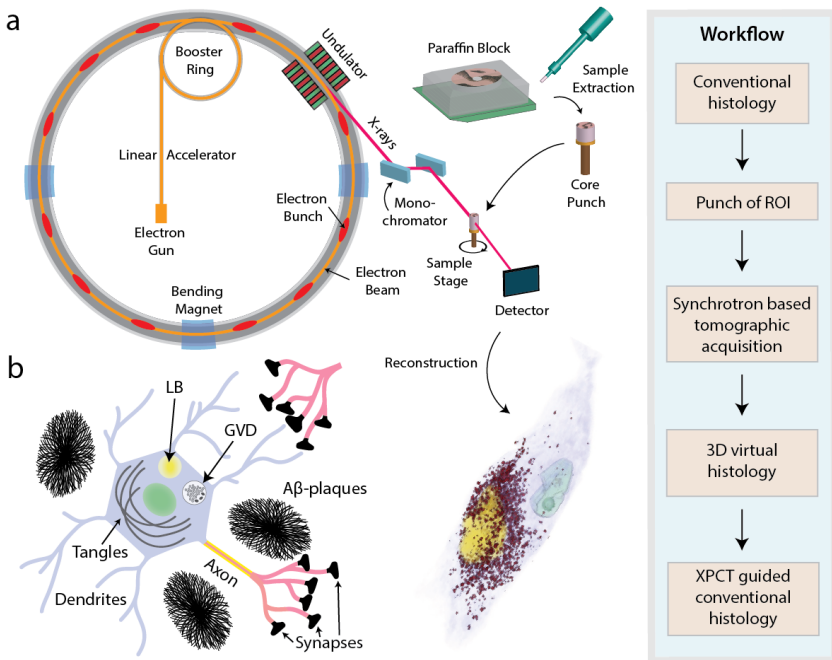

**Fig. 1:** Experimental approach. **a** Sample preparation, including tissue preparation, fixation, dehydration and paraffin wax infiltration and subsequent extraction of small tissue punches. **b** Illustration of selected intra- and extracellular neurodegenerative pathologies and biomarkers.

## 142 **2.1 Intraneuronal protein aggregates and vacuoles**

### 143 *Lewy bodies in the substantia nigra closely associate with* 144 *neuromelanin granules*

145 LBs are the classical histomorphological hallmark of PD and show differ-  
146 ent morphologies depending on the neuronal subtype affected. Whereas LBs  
147 mainly consist of fibrillary  $\alpha$ -Synuclein, other proteins as well as membranous  
148 organelles are embedded in the globular structure mostly presenting with a  
149 dense halo and a pale rim in classical histology [28, 29]. In the substantia  
150 nigra, locus coeruleus, dorsal nucleus N. V and other pigmented nuclei, LBs are  
151 in close spatial relationship with neuromelanin which is absent in most other  
152 mammals and hypothesized to facilitate LB formation [30–32]. Neuromelanin  
153 was furthermore reported to play a pivotal role in neuroinflammatory pro-  
154 cesses during progression of PD [33]. In the 3D reconstruction (Fig. 2a), the  
155 layered substructure of the LB is easily discernible and reveals a dense homo-  
156 geneous core with a less intense surrounding shell. Also, we found that LBs  
157 in the substantia nigra are embedded in the cluster of neuromelanin granules  
158 (NMGs).

### 159 *3D arrangement of Hirano bodies and co-occurrence with* 160 *granulovacuolar degeneration*

161 HBs are eosinophilic rod-shaped structures which mostly occur in large pyra-  
162 midal neurons of the subiculum and CA1 sector in patients with AD. Their  
163 origin and role in AD pathophysiology remain largely elusive although their  
164 composition of actin filaments suggests a relation to cytoskeletal disruption.  
165 Light microscopic and EM studies suggest that HBs extend beyond the pro-  
166 jected neuronal surface presumably leading to a cell membrane protuberance.  
167 Fig. 2b highlights the ability of XPCT to capture the 3D structure of HBs in  
168 human hippocampal tissue. Remarkably, HBs exhibit a pronounced contrast  
169 in XPCT compared to their typically rather inconspicuous appearance in  
170 H&E (Fig. 2b). The representation in Fig. 2b shows the 3D orientation of  
171 a HB (orange) with respect to the rest of the neuronal cell body (yellow)  
172 and the cellular nucleus (blue), demonstrating the lack of respect for the  
173 classical neuronal shape. This first human pathology based 3D representation  
174 demonstrates the relationship of the HB to the soma of the nerve cell but  
175 also shows its disruptive morphology beyond usual nerve cell borders. We  
176 also demonstrate here that HBs co-occur with granulovacuolar degeneration  
177 in the same neuron (Fig. 2b).

### 179 *Granulovacuolar degeneration fills large parts of the affected neuron*

180 GvD is a characteristic intraneuronal pathology predominantly occurring in  
181 the subiculum and CA1 region in patients with AD characterized by a grain-  
182 like basophilic core surrounded by an optically empty vacuole. The presence  
183 in brain regions particularly vulnerable to AD pathology, its correlation with

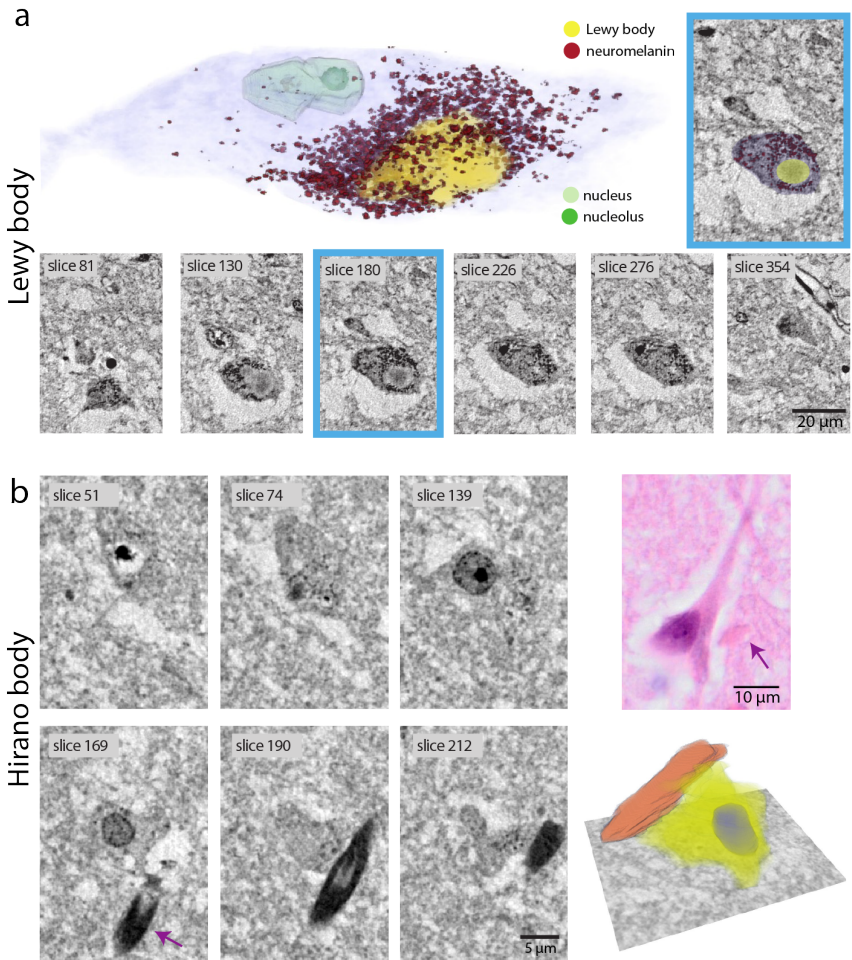

**Fig. 2: Lewy bodies (LBs) with neuromelanin granules and Hirano bodies (HBs) visualized in synchrotron  $\mu$ CT scans. a** Virtual section through the reconstructed volume of a dopaminergic neuron (blue: neuron surface, yellow: LB, red: neuromelanin granules, light green: nucleus, dark green: nucleolus) recorded with the cone beam SR2-setup and exemplary virtual serial slices of a LB. **b** 3D reconstruction of a HB from an AD patient CA1 region with serial sections (SR2-setup) and a HB in HE staining from the same tissue block.

184 NFT density and frequent occurrence in dysmorphic neurons suggest a close  
185 relationship to neurodegeneration. Also, GvD correlates with clinical dementia  
186 [7]. GvD has been proposed to reflect increased neuronal autophagy [34, 35].  
187 Here, the 3D reconstruction enabled by XPCT allowed us to study how much  
188 of an affected neuron is occupied by GvD. Fig. 3a shows an in part shrunken,  
189 but on the other hand bulging neuron from the CA1 hippocampal region  
190 of an AD patient overcrowded with GvD. The high resolution, contrast and  
191 signal-to-noise ratio allow for a segmentation of individual granules and their  
192 surrounding vacuoles (Fig. 3 (a)). These annotations reveal a large assembly  
193 of vacuoles and granules. It appears as if vacuoles in part merge which has  
194 recently been reported in an animal model of GvD using STED-microscopy  
195 [36]. GvD seems to bulge the neuron asymmetrically. Note that GvD was also  
196 detectable in the large field of view (FOV) reconstruction obtained from the  
197 SR1-setup (supplementary information Fig. 6).

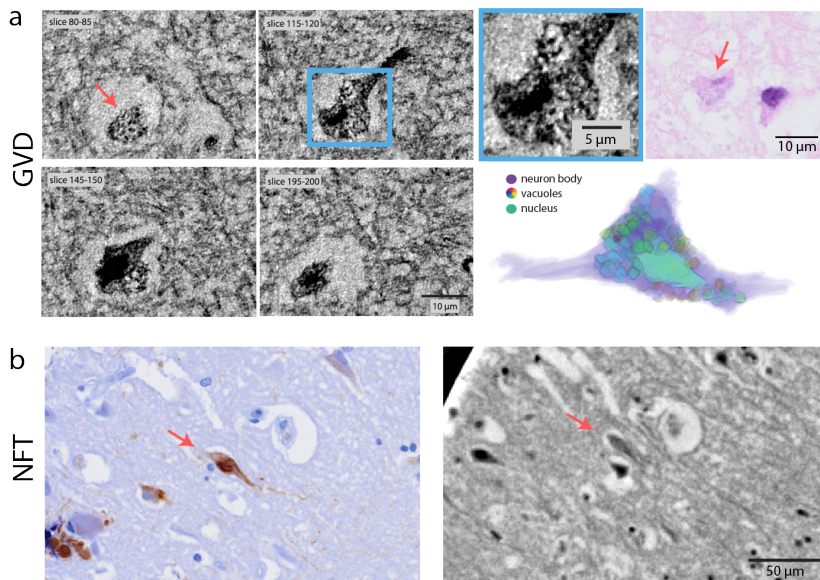

**Fig. 3: Granulovacuolar degeneration (GvD) and neurofibrillary tangles (NFTs) assessed by synchrotron  $\mu$ CT scans. a** 3D rendering of manually segmented granulo-vacuoles from a CA1 neuron of an AD patient's hippocampus with virtual serial sections of GvD (maximum intensity projections, SR2-setup) and correlative histology (H&E). **b** Tangle-bearing neurons identified by correlative immunohistochemistry (AT8) and corresponding XPCT scan (SR1-setup).

198 ***High resolution XPCT reveals similar contrast in neurons with or***  
199 ***without neurofibrillary tangles***

200 NFTs consist of hyperphosphorylated tau forming a helical and barely soluble  
201 structure. Neuropathological Braak staging of AD reflects an increasing pres-  
202 ence of NFT-bearing neurons from entorhinal to limbic to neocortical brain  
203 regions. Interestingly, the intracellular tau-aggregates were difficult to identify  
204 in XPCT, in particular if compared to the easily discernable HBs or LBs. To  
205 ensure the proper identification of individual neurons with NFTs in XPCT,  
206 we optimized the correlative immunohistochemical (IHC) analysis and applied  
207 a manual image registration approach using landmarks such as blood vessels  
208 (see supplementary information). This technique allowed us to identify tangle-  
209 bearing AT8-positive neurons visible in both the IHC-stained slice as well as  
210 in XPCT, thus enabling, e.g., comparative electron density measurements in  
211 tangle-bearing and non tangle-bearing neurons. Of note, only slight composi-  
212 tional heterogeneities of electron densities in the soma of affected neurons were  
213 observed (Fig. 3b).

214 **2.2 Detection of  $\beta$ -amyloid aggregation**

215 Aside from intraneuronal aggregates, amyloid- $\beta$  species, which are cleaved  
216 extracellular peptides, have been central to neurodegenerative research for  
217 decades and are currently a molecular target for emerging therapies [37].  
218 Though  $\beta$ -APs and associated microglia activation can be measured using  
219 PET, current clinical CT scanners lack the capability to visualize different  
220 plaque types or to detect amyloid deposits in arterioles, veins, or capillaries in  
221 CAA. Our approach first involved a detailed characterization of  $\beta$ -APs using  
222 the cone-beam high-resolution SR2-setup. Secondly, the feasibility to inves-  
223 tigate CAA with the parallel beam SR1-setup was demonstrated, which is  
224 important because larger tissue volume throughput can be achieved in this  
225 setting, which is required in order to search for these pathologies.

226 ***Dense core of  $\beta$ -amyloid plaques yields higher  $\mu$ CT contrast***

227  $\beta$ -APs are heterogeneous extracellular protein deposits characterized by vary-  
228 ing  $\beta$ -amyloid/protein densities, different 3D structures and distinct responses  
229 of the surrounding CNS microenvironment. Their presence is an indispens-  
230 able feature for AD diagnosis. In our study, even the parallel beamline of the  
231 SR1-setup allowed to delineate the comparatively dense protein core of  $\beta$ -APs.  
232 Here, an effective pixel size of 650 nm enabled the detection and analysis of  
233 cored plaques in larger tissue volumes. The improved resolution offered by the  
234 SR2-setup with a cone beam even allowed to identify the shell of a cored plaque  
235 with good contrast compared to the underlying glial matrix, as visualized in  
236 Fig. 4a. Employing the correlation workflow outlined above, IHC images of  
237 stained  $\beta$ -APs (using the 6E10 antibody) were juxtaposed to the correspond-  
238 ing XPCT measurements. Due to their size, the same amyloid plaque could  
239 easily be identified in both measurements. The second row of Fig. 4a displays  
240 cored plaques measured in the SR1 beamline, clearly identified by correlative



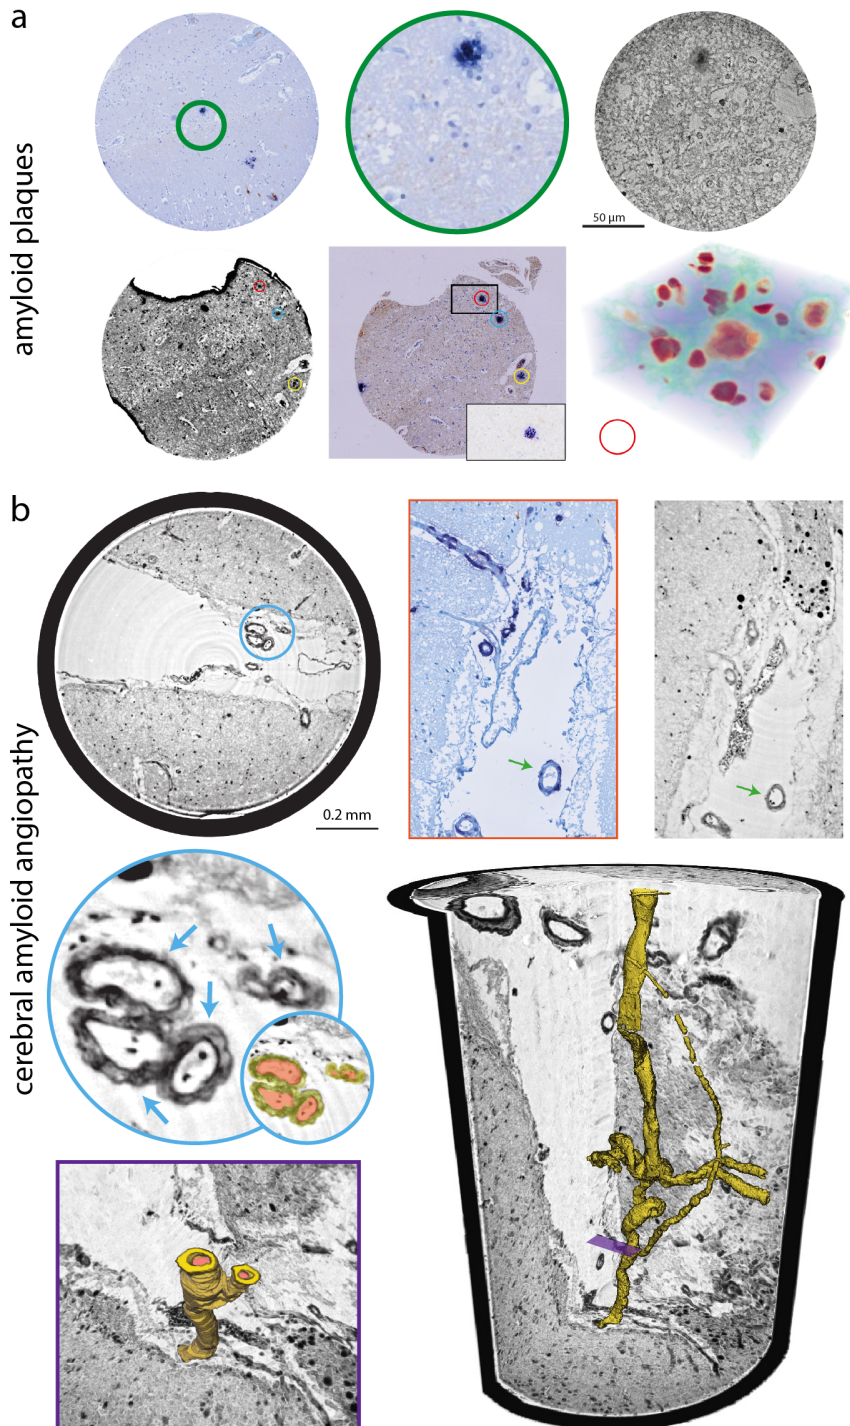

**Fig. 4:  $\beta$ -amyloid plaques ( $\beta$ -APs) and cerebral amyloid angiopathy (CAA) visualized by XPCT.** **a** Correlative IHC of  $\beta$ -APs (6E10, FastBlue) and high resolution XPCT (SR2-setup). Second row: low resolution XPCT with correlative IHC (6E10) and three dimensional representation of surrounding nuclei, blood vessels and  $\beta$ -APs. **b** CAA with affected meningeal blood vessels recorded with the SR1-setup. Shown is a circular section through the 3D volume (lower right corner) with a magnified group of three blood vessels (blue) and a magnified part of the 3D rendered image (purple). Correlative IHC (red) of the affected meningeal blood vessel (green arrow) confirmed vascular amyloid deposits.

241 IHC, and their 3D distribution. However, diffuse plaques were still difficult  
242 to detect by XPCT even with the improved resolution of the SR2-setup since  
243 they only showed a slight compaction of the texture of the tissue.

#### 244 *Cerebral amyloid angiopathy*

245 CAA may accompany AD, but may also occur independently. Characteris-  
246 tically, vessel wall structures are disrupted by  $\beta$ -amyloid deposits leading to  
247 vascular fragility and bleeding, and more rarely, vasculitis. As for extracellu-  
248 lar plaques, the amyloid deposits in CAA were well detectable by XPCT, also  
249 in the SR1-setup, thus enabling a multi-scale approach with larger volume  
250 throughput. Applying correlative IHC it became clear that affected vessel walls  
251 showed slightly increased contrast, see Fig. 4b (red). The 3D reconstruction  
252 of one exemplary affected small meningeal arteriole demonstrates the varying  
253 vessel diameter, vessel branching, and the extent of amyloid deposition (Fig.  
254 4b lower right corner).

### 255 2.3 Quantitative comparison of electron densities 256 obtained by XPCT

257 Building on the unique contrast mechanism of XPCT to delve into hallmark  
258 features of human neurodegenerative diseases, the electron density of pro-  
259 tein aggregates and GvD was assessed. Unlike conventional histology and IHC  
260 which rely on staining-specific amplification methods, the image formation of  
261 XPCT is directly linked to the electron density distribution. Using standard-  
262 ized acquisition and analysis, the electron density can be calculated from the  
263 phase shifts obtained by phase retrieval. Therefore, image gray values can be  
264 regarded as quantitative measurements of the local electron density. While  
265 this relationship can be more difficult to establish when absolute numbers are  
266 required, it is easier and more robust to provide analysis on local differences in  
267 electron density. Here the paraffin embedding provides a well suited reference  
268 to 'calibrate' electron density. Since electron density (or correspondingly the  
269 mass density) effectively mirrors biological parameters such as fibril density or  
270 the presence of metal ions, it can provide important additional information on  
271 a given pathology. Of note, the standardized image acquisition process allows a

272 direct comparison of neuronal and extracellular protein aggregates and struc-  
273 tures, even across different diseases (for details on electron density calculation,  
274 see supplementary information).

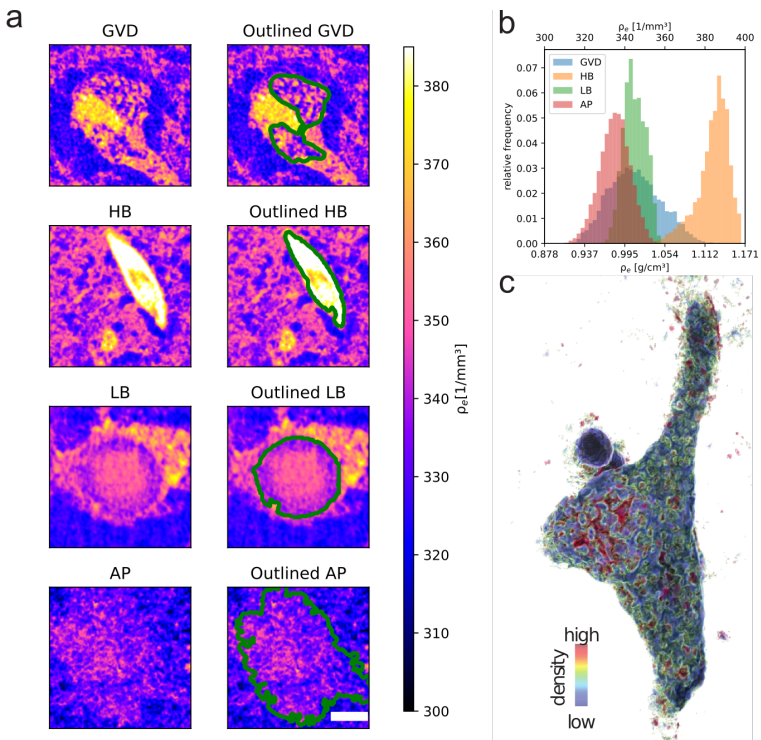

**Fig. 5: Electron densities of human neurodegenerative pathologies measured by synchrotron XPCT scans.** **a** showcases cross-sectional calculated electron densities of neurodegenerative pathologies, with each row representing a different pathology (scalebar 5  $\mu$ m). The right images feature the same section overlaid with a green ROI delineating the electron density measurement for **b**. Panel **b** presents the electron density histograms for GvD, HBs, LBs, and  $\beta$ -APs, illustrating the distribution of electron densities within each pathological feature. Panel **c** depicts a high-resolution calculated electron density image of a neuron with GvD, color-coded to represent electron density levels from high (red) to low (blue).

275 Electron density assessment revealed small inhomogeneities on the scale of 2-3  
276  $\mu$ m within the LB, predominantly in the so-called "halo", compatible with the  
277 notion that organelles may be encased in the fibrillary  $\alpha$ -synuclein network  
278 (see **5a** and Fig.7 in[28]). Notably, the calculated quantitative electron density  
279 revealed a circular arrangement of these hypodense, potentially lysosomal



280 organelles at the outer part of the LB, providing insights into the subcellular  
281 composition of this aggregate.

282 Using this approach, we could assign to HBs electron densities comparable  
283 to those of neuromelanin granules (see **5a + b**), underscoring the utility of  
284 XPCT in differentiating between various intracellular aggregates based on their  
285 electron density profiles. GvD, in contrast, and as expected, did not display  
286 a homogeneous distribution of electron densities. However, we also could not  
287 ascertain a clearly bimodal distribution. This is suggestive of vacuoles showing  
288 a slowly increasing density towards their central "grain". Lastly, consistent  
289 with its imaging behaviour, the extracellular amyloid plaque seemed to be  
290 composed rather loosely, and only the core showed a slight increase in electron  
291 density.

### 3 Discussion

Protein aggregates are a central hallmark of numerous neurodegenerative diseases instructing genetic and pathogenetic research; however, their formation, cytoplasmic embedding, and role for neuronal toxicity are not resolved. In this work, we leveraged XPCT of paraffin-embedded autopsy tissue combined with correlative immunohistology to identify and compare disease-defining pathological protein aggregates and inclusions in their full 3D and at sub-cellular scale. Our studies revealed a close spatial relationship of neurodegenerative protein aggregates to other intracellular structures, e.g. neuromelanin, and distinct properties with regard to electron density. While we observed a particularly high electron density in HBs, NFTs were barely visible and required correlative imaging techniques. In GvD, instead of the expected bimodal density distribution, we found a gradient of increasing electron densities towards the central "grain", suggesting increasing protein content. In summary, our work combines advanced X-ray imaging techniques and correlative immunohistology in neurodegenerative diseases demonstrating its capability for 3D assessment of protein aggregates and inclusions on the tissue and subcellular levels.

While the general compatibility of XPCT and FFPE samples has been previously established [25, 26, 38], we demonstrate here that improvements in resolution and contrast, facilitated by the specificities of the SR2-setup (see below), are sufficient to identify and to quantify also subcellular neuronal pathologies, such as LB, GvD, and HB. To our knowledge, some of these structures have never or only rarely been imaged in 3D before.

The size and orientation of protein aggregates relative to the cellular body and nucleus may have significant implications, offering valuable insights into their development within the cell. For instance, the peculiar orientation of HB revealed through 3D virtual histology by XPCT (see Fig. 2b) may give indications with regard to its mechanism of formation. Likewise, the 3D association of neuromelanin around LB observed here (see Fig. 2a) is noteworthy and increasing the evidence for an association of fibrillary alpha-synuclein with neuromelanin pigments derived from extensive two dimensional histological studies [30]. The usual size of LB ranges from 5 to 25  $\mu\text{m}$  in diameter with a dense eosinophilic core of filamentous and granular material surrounded by radially oriented filaments [39, 40]. This core and the filamentous shell are likely to be reflected in the XPCT reconstruction in form of elevated levels of electron density by XPCT. There is also recent evidence using confocal as well as super-resolution stimulated emission depletion (STED)-microscopy combined with electron microscopy and tomography that dense lysosomal structures and a shell of distorted mitochondria surround some of the LB inclusions (see Fig. 7 of [28]). In the present study we were able to even identify these LB substructures, owing to the superior resolution provided by the SR2-setup.

334 While the 3D inspection alone allowed us to better understand the nature of  
335 the aggregates, their distribution in the tissue and their relation to other intra-  
336 cellular structures, the quantitative analysis of XPCT contrast values revealed  
337 significant differences in electron densities between subcellular aggregates.

338 While the 3D inspection alone allowed us to better understand the nature of  
339 the aggregates, their distribution in the tissue and their relation to other intra-  
340 cellular structures, the quantitative analysis of XPCT contrast values revealed  
341 significant differences in electron densities between subcellular aggregates. By  
342 far the highest electron density was found in HBs. This finding is in line with  
343 previous electron microscopy studies using quick-freeze deep-etch technology  
344 where HBs were demonstrated to consist of intracellular and densely packed  
345 fibrillary aggregates [41]. Compared to HBs the distribution of electron den-  
346 sities in LBs is lower, hinting towards less densely aggregated proteins or an  
347 inclusion of elements with higher electron density like metals in HB. The elec-  
348 tron density in LBs is in the range of that of the GvD granules. However,  
349 GvD exhibits a broader distribution with a lower mean value accounting also  
350 for the vacuoles. The lowest values in GvD approximately reach a density of  
351  $\rho_e^{GvD} \approx 320 - 330$  (compare to paraffin with  $\rho_e^{paraffin} = 328$ ). This would  
352 relate to the almost protein free vacuolar space in between granules. Note,  
353 however, that this absolute result relies on the assumed density of the paraffin  
354 wax in our analysis and the corresponding reference normalization.

355 Here, and to our knowledge for the first time, correlative immunohistochem-  
356 istry was used to facilitate, at a single cell resolution, the identification of  
357 neurons with NFTs in XPCT. Even though the identification of tangle-bearing  
358 neurons in the investigated samples was not yet possible by XPCT alone, the  
359 highly precise measurements and definitive identification of tangles through  
360 well established methods allowed us to draw pertinent conclusions. Of note,  
361 and compared to HBs and LBs, tangles do not lead to a homogeneous increase  
362 in the electron density of affected neuronal cytoplasm. Relating this finding  
363 to existing electron microscopy and STED-microscopy studies thus suggests  
364 that individual NFTs are surrounded by numerous subcellular organelles and  
365 do not densely fill up the neuron [42–44]. XPCT may therefore serve as a  
366 complementary method to highly advanced cryo-EM resolving the atomic  
367 structure of protein aggregates, for example, of tau filaments in AD [45]. We  
368 can hypothesize from our studies that the pathologic effect of tangles may be  
369 mediated more by a derangement of the cytoskeleton, especially the micro-  
370 tubules, obviously leading to various cellular dysfunctions, rather than by  
371 completely replacing existing subcellular organelles as observed in HBs. Our  
372 study also raises the question if extended XPCT methods implementing X-ray  
373 contrast agents or increased resolution will be able to identify pathological tau  
374 filaments. Note that the resolution of XPCT has not yet reached its fundamen-  
375 tal limits, and can be expected to be further increased by ongoing instrumental  
376 improvements.

377 Also for  $\beta$ -APs, correlative IHC further improved our detection sensitivity  
378 as demonstrated by high resolution images of the SR2-setup (see Fig. 4a).

379  $\beta$ -APs were recently identified by XPCT in unstained human autopsy brain  
380 tissue by Chourrout et al. [15], reporting varying contrasts in mice and humans  
381 supposedly depending on the degree of calcium accumulation, in line with  
382 findings by Toepfer et al. where mineralized plaques could be clearly  
383 observed even with in-house  $\mu$ CT instrumentation [23]. Our electron density  
384 measurements revealed that the core of  $\beta$ -APs showed a significantly higher  
385 electron density while the less dense shell is only barely visible even in the high  
386 resolution SR2-setup. One may wonder why  $\beta$ -APs or NFTs are difficult to  
387 detect in XPCT. Since for FFPE tissue, contrast is generated by the difference  
388 with respect to the embedding paraffin matrix, this can happen for organelles  
389 or structures which happen to exhibit similar density as the matrix. As a  
390 solution, contrast variation by different embedding media could be employed  
391 [11].

392 Not only but also in the light of amyloid therapy-related adverse effects a  
393 better understanding of vascular amyloid deposition and microhemorrhage  
394 is important (Salloway 2021, Cummings 2023). CAA and  $\beta$ -amyloid related  
395 angiitis (ABRA) represent a significant risk factor for intracerebral micro-  
396 and macrohemorrhages. Thus, a 3D visualization of microvascular changes  
397 may help to scrutinize effects of amyloid depositions in blood vessels also as  
398 an effect of amyloid targeting therapies. The highly precise  $\mu$ -CT strategy  
399 developed in this study (Fig. 4b) demonstrates a new scale for the identifi-  
400 cation of even minor blood vessel changes invisible to angiography and for  
401 investigations of small vessel branching.

402  
403 While the voxel size and instrumental resolution (as determined for high  
404 contrast objects) are clearly sufficient to image the targeted pathologies at sub-  
405 cellular scale, the reconstruction of the FFPE tissue still exhibits substantial  
406 noise. In fact, as outlined above, it is the low contrast of specific features such  
407 as unmineralized  $\beta$ -APs which limits the 3D structural information gained  
408 rather than the instrumental resolution. For the SR2-setup in particular, 50  
409 nm (half period) resolution has been achieved in inorganic samples with high  
410 contrast or in metalized biological specimens [13, 46]. In order to reduce noise  
411 and to increase contrast in the present unlabeled FFPE tissues, one can either  
412 increase dose or decrease the photon energy  $E$ . Since the phase shift  $\Delta\phi$  per  
413 resolution element scales with  $E^{-1}$  (away from absorption edges), the contrast  
414 increases accordingly. Note that the diameter of the biopsy punches would  
415 clearly allow a reduction of  $E$  by at least a factor of two.

416 Future extension of this work may also include recently developed X-ray  
417 stains [47–50] and labels to improve contrast not only for distinct structural  
418 hallmarks of neurodegeneration covered in this work, but also for the indi-  
419 vidual cellular components, e.g., axons, dendrites or synapses, or the myelin  
420 sheath which would open up a new perspective for X-ray imaging of myelin-  
421 associated diseases, such as multiple sclerosis.

423 In summary, our work combines X-ray phase contrast tomography and  
424 correlative immunohistology on paraffin-embedded tissue specimens of neu-  
425 rodegenerative diseases. This approach allows us to identify protein aggregates  
426 and other inclusion bodies and reveals their 3D distribution in tissue, relevant,  
427 e.g., for studies of spreading of pathology. In addition, this multi-scale approach  
428 enables subcellular 3D assessment of inclusion bodies, revealing insights into  
429 their relation to subcellular organelles. Upcoming technological developments  
430 will further increase the usefulness of this technology for the study of human  
431 CNS diseases.

## 432 4 Methods

### 433 *Sample preparation*

434 Human brain tissue from individuals who underwent diagnostic autopsy in  
435 the context of routine clinical care was obtained from the archives of the  
436 Department of Neuropathology UMG in accordance with UMG ethics regula-  
437 tions. Small brain tissue blocks were dissected from 10% formalin-fixed brain  
438 slices, dehydrated, and paraffin embedded (see [26]). One FFPE tissue block  
439 measured about  $2 \times 3 \times 0.3$  cm<sup>3</sup>. In total, four samples from four individuals  
440 were selected for the study, including two samples from the hippocampal CA1  
441 region (both with immunohistochemically confirmed NFTs (see immunohisto-  
442 chemistry)), one sample from the substantia nigra from a PD patient and  
443 one from the temporal cortex including the leptomeninges of a patient with  
444 CAA. Regions of interest were defined on an adjacent histological section. To  
445 prepare the samples for XPCT image acquisition, cylindrical 1 mm biopsies  
446 were extracted from the paraffin blocks, inserted in a polyimide tube and  
447 placed on Huber pins. After imaging, these paraffin blocks were again embed-  
448 ded in paraffin and processed for further histological or immunohistochemical  
449 analysis.

450

| Patient | Diagnosis    | Age   | Sex  | Region Of Interest |
|---------|--------------|-------|------|--------------------|
| # 1     | AD (A3B3C3)  | 61-65 | male | CA1                |
| # 2     | AD (A3B3C3)  | 91-95 | male | CA1                |
| # 3     | PD           | 76-80 | male | SN                 |
| # 4     | PART and CAA | 86-90 | male | CTX                |

**Table 1:** Patient characteristics. AD = Alzheimer’s disease, PD = Parkin-  
son’s disease, PART= primary age related tauopathy, CAA = cerebral amyloid  
angiopathy, CA1 = hippocampal cornu ammonis 1, CTX = cortex, SN = sub-  
stantia nigra

## 451 ***Immunohistochemistry***

452 Immunohistochemistry was performed on 2-3  $\mu\text{m}$  thick paraffin sections. Pre-  
453 treatment included hydrogen peroxide as well as formic acid (98%) (for A $\beta$   
454 immunohistochemistry only), blocking in 10% normal goat serum as well as  
455 heat antigen retrieval (citrate buffer, pH 6). Incubation of primary antibodies  
456 over night (tau: mouse, clone at8, Thermo Fisher Scientific, 1:100;  $\beta$ -amyloid:  
457 mouse, clone 6E10, Zytomed Systems GmbH, 1:500) was followed by secondary  
458 antibody incubation either coupled to alkaline phosphatase (polyclonal goat  
459 anti-mouse, Dako, 1:50) or to biotin (monoclonal sheep anti-mouse, GE Health-  
460 care Life Sciences, 1:100). Slides were developed using avidin-peroxidase with  
461 DAB and/or fast blue.

## 462 ***Propagation-based phase-contrast imaging at the synchrotron***

463 Synchrotron radiation allows for imaging with high coherence and brilliance  
464 and can cover multiple length scales down to sub-100 nm resolution. In this  
465 work we take advantage of a multiscale XPCT approach, using the paral-  
466 lel beam (SR1) configuration of the GINIX endstation installed at the P10  
467 beamline of the PETRA III storage ring (DESY, Hamburg) [51] and the nano-  
468 imaging beamline (SR2) ID16A (ESRF, Grenoble, France). While the former  
469 is optimized for larger FOV with a parallel beam geometry, the latter is dedi-  
470 cated to propagation-based holographic tomography of biological samples, and  
471 operates in the hard X-ray regime (17-33.6 keV). To achieve high resolutions,  
472 the beam is focused by a pair of Kirkpatrick-Baez (KB) mirrors. Both provide  
473 quantitative phase contrast which allows to retrieve information on the electron  
474 density in the sample, making them especially useful for biomedical applica-  
475 tions. The two configurations can be used complementarily to study biological  
476 tissue at multiple scales. Details on the setup and acquisition parameters can  
477 be found in the Supplementary Document.

- 478 • SR1: The imaging procedure involved an overview scan using a field of view  
479 (FOV) of approximately 1.5 mm. Therefore, a parallel-beam configuration  
480 was employed, enabling continuous rotation and resulting in an overall scan  
481 time of approximately 2 minutes. The acquisition of single-distance tomo-  
482 grams involved 3000 projections captured over a 360° rotation. To achieve  
483 a well-defined photon energy for studying the tissue, a Si(111) channel-cut  
484 monochromator was utilized, eliminating the broad band-pass limitations  
485 inherent in in-house CT systems. On the registration side, a high-resolution  
486 detection system (Optique Peter, France) with a 50 mm-thick LuAG:Ce  
487 scintillator and a 10 $\times$  magnifying microscope objective [51] was coupled  
488 with the sCMOS camera pco.edge 5.5 (PCO, Germany). The camera per-  
489 forms with a maximum frame rate of 100 Hz, utilizing a rolling shutter and  
490 fast scan mode. This configuration yielded an effective pixel size of 0.65  $\mu\text{m}$ ,  
491 with an approximate total exposure time of 96 s. To achieve the desired  
492 imaging conditions, certain components such as KB-mirrors, waveguide,  
493 and the fast shutter were removed from the beam path. Additionally, the  
494 beam size was adjusted to approximately 2 $\times$ 2 mm using an upstream slit

495 system (refer to Fig. 1d).

- 496
- 497 • SR2: The nano-imaging beamline ID16A provides a highly-brilliant, low-  
498 divergent beam optimal for three dimensional high-resolution imaging of  
499 biological samples or other nanomaterials e.g. in batteries. With its multi-  
500 layer monochromator and focusing KB-mirrors, it allows for photon energies  
501 of either 17.1 or 33.6 keV and a photon flux of up to  $4.1 \cdot 10^{11} \frac{ph}{s}$ . The cone  
502 beam geometry enables a magnification of the projected pixels resulting in  
503 possible effective pixel sizes  $px_{eff}$  of less than 10 nm. The monochromaticity  
504 allows for a subsequent quantitative analysis and retrieval of sample charac-  
505 teristics such as electron density. Due to the strong magnification and high  
506 coherence, phase propagation can be very accurately recorded and recon-  
507 structed from the strongly holographic projections ( $F \ll 1$ ). For detection,  
508 a XIMEA sCMOS based indirect imaging detector with 6144 x 6144 pixel  
509 ( $10 \mu\text{m}$  physical pixel size) and a  $10\times$  magnifying microscope objective was  
510 used. In this experiment the projections were binned ( $3 \times 3$ ), with effective  
511 pixel sizes ranging from 90 to 140 nm. 2000 projections were recorded per  
512 scan with additional random sample displacement for every angle to cor-  
513 rect for wavefront inhomogeneities and therefore avoiding ring artifacts [52].  
514 Tomographic scans were acquired at four distances to account for zero cross-  
515 ings in the CTF phase reconstruction [53]. From the four distances, the one  
516 with the highest resolution and largest FOV is combined, resulting in an  
517 “extended FOV” of  $3216^2$  pixel in the resulting tomographic slices (refer to  
518 Fig. 1e).

### 519 *Data processing*

520 Projections were acquired and saved using the .tiff or .raw format. After flat  
521 field and dark image correction, operating in the holographic regime, phase  
522 retrieval was performed using either the contrast transfer function (CTF,  
523 [53, 54]), the nonlinear Tikhonov (NLT, [55]) or a Paganin-based iterative  
524 scheme [56] (see supplementary information). On the phase retrieved projec-  
525 tions, ring removal techniques were conducted (only random displacement at  
526 SR2-setup) as well as an automatic rotation axis correction. Tomographic  
527 reconstruction was then performed by either filtered back projection (par-  
528 allel beam, SR1) or the Feldkamp-Davis-Kress (FDK, [57]) algorithm. Both  
529 techniques are implemented in the ASTRA-Toolbox [58] for MATLAB and  
530 incorporated into the HolotomoToolbox [59]. Further details on the different  
531 reconstruction schemes can be found in the supplementary information.

### 533 *Segmentation and visualization of cell components*

534 After tomographic reconstruction of the recorded, phase-retrieved, projec-  
535 tions and visual inspection, different structures were proposed for further  
536 analysis. After selection, segmentation was conducted using seeded water-  
537 shed algorithms, deep learning based techniques (webKnossos [60]), scalable



538 minds GmbH, Potsdam, Germany) or simple thresholding. Subsequently, ren-  
539 dering software such as NVIDIA IndeX (NVIDIA, Santa Clara, US), Avizo  
540 (Thermo Fisher Scientific, Waltham, US) and ZEISS arivis (Carl Zeiss AG,  
541 Oberkochen, Germany) was used for a three-dimensional visualization of the  
542 dataset. For additional post processing such as orthogonal views and maxi-  
543 mum intensity projections the Fiji software was used [61]. Segmentation masks  
544 for electron density calculations were manually generated using QuPath [62].  
545 Details on segmentation and electron density calculations can be found in the  
546 supplementary information.

## 547 **5 Declarations**

### 548 **Ethics approval and consent to participate**

549 Brain tissue blocks of patients with neurodegenerative diseases were obtained  
550 during diagnostic autopsy and retrieved from the archives of the Institute of  
551 Neuropathology, University Medical Center Göttingen, Germany. The tissue  
552 was used in an anonymized fashion. The study was approved by the ethics  
553 committee of the University Medical Center Göttingen (22/1/19).

### 554 **Consent for publication**

555 For the purpose of open access, the authors have applied a CC BY pub-  
556 lic copyright license to all Author Accepted Manuscripts arising from this  
557 submission.

### 558 **Data availability**

559 Raw data were generated at ESRF and DESY. Raw data will be released and  
560 made public two years after the beamtime. All treated datasets are available  
561 from the corresponding authors on reasonable request. Exemplary datasets  
562 that support the findings of this study will be openly available in GRO.data  
563 upon publication.

### 564 **Competing interests**

565 The authors declare no competing interests.

### 566 **Funding**

567 The work was funded by the Deutsche Forschungsgemeinschaft (DFG, German  
568 Research Foundation) – Project-ID 432680300 – SFB 1456/A03 *Mathematics*  
569 *of Experiment* and under Germany’s Excellence Strategy - EXC 2067/1-  
570 390729940. This research was funded in part by Aligning Science Across  
571 Parkinson’s ASAP-020625 through the Michael J. Fox Foundation for Parkin-  
572 son’s Research (MJFF). JF was supported by the UMG Clinician Scientist  
573 Program. JR was supported by the Hertha Spöner College (MBExC).



## Contribution statement

JR and JF contributed equally to this work. TS, CS, JF and JR conceived the experiments and analysis. JF selected and prepared the samples. JR, TS conducted the synchrotron experiments, together with ME, acting as local contact at the ID16A beamline. KS and JF performed correlative immunohistochemistry. JR performed data processing, image reconstruction and visualization. JF annotated data and performed data processing. JR, JF, and CS interpreted the results in terms of neuropathology. BM supported tissue procurement. TS, CS, JF and JR wrote the manuscript. All authors reviewed the manuscript.

## Acknowledgements

We thank Markus Osterhoff, Michael Sprung and Fabian Westermeier for their continuous support at the instrument GINIX/P10 (PETRA III, DESY). We also acknowledge assistance in visualization with NVIDIA IndeX (NVIDIA Corporation, USA). We thank Heidelinde Brodmerkel, René Müller and Melina Wüstefeld for excellent technical assistance.

## References

- [1] Attems, J., Toledo, J.B., Walker, L., Gelpi, E., Gentleman, S., Halliday, G., Hortobagyi, T., Jellinger, K., Kovacs, G.G., Lee, E.B., Love, S., McAleese, K.E., Nelson, P.T., Neumann, M., Parkkinen, L., Polvikoski, T., Sikorska, B., Smith, C., Grinberg, L.T., Thal, D.R., Trojanowski, J.Q., McKeith, I.G.: Neuropathological consensus criteria for the evaluation of Lewy pathology in post-mortem brains: a multi-centre study. *Acta Neuropathologica* **141**(2), 159–172 (2021). <https://doi.org/10.1007/s00401-020-02255-2>. Accessed 2021-03-13
- [2] Kovacs, G.G., Lukic, M.J., Irwin, D.J., Arzberger, T., Respondek, G., Lee, E.B., Coughlin, D., Giese, A., Grossman, M., Kurz, C., McMillan, C.T., Gelpi, E., Compta, Y., Van Swieten, J.C., Laatsch, L.D., Troakes, C., Al-Sarraj, S., Robinson, J.L., Roeber, S., Xie, S.X., Lee, V.M.-Y., Trojanowski, J.Q., Höglinger, G.U.: Distribution patterns of tau pathology in progressive supranuclear palsy. *Acta Neuropathologica* **140**(2), 99–119 (2020). <https://doi.org/10.1007/s00401-020-02158-2>. Accessed 2023-09-27
- [3] Kovacs, G.G., Xie, S.X., Robinson, J.L., Lee, E.B., Smith, D.H., Schuck, T., Lee, V.M.-Y., Trojanowski, J.Q.: Sequential stages and distribution patterns of aging-related tau astroglialopathy (ARTAG) in the human brain. *Acta Neuropathologica Communications* **6**(1), 50 (2018). <https://doi.org/10.1186/s40478-018-0552-y>. Accessed 2021-01-28
- [4] Braak, H., Braak, E.: Neuropathological staging of Alzheimer-related changes. *Acta Neuropathologica* **82**(4), 239–259 (1991). <https://doi.org/>

613 [10.1007/BF00308809](https://doi.org/10.1007/BF00308809). Accessed 2021-04-01

- 614 [5] Braak, H., Alafuzo, I., Arzberger, T., Kretschmar, H., Tredici, K.D.:  
615 Staging of Alzheimer disease-associated neurofibrillary pathology using  
616 paraYn sections and immunocytochemistry. *Acta Neuropathol*, 16 (2006)
- 617 [6] Thal, D.R., Rüb, U., Orantes, M., Braak, H.: Phases of A beta-deposition  
618 in the human brain and its relevance for the development of AD.  
619 *Neurology* **58**(12), 1791–1800 (2002)
- 620 [7] Thal, D.R., Del Tredici, K., Ludolph, A.C., Hoozemans, J.J.M.,  
621 Rozemuller, A.J., Braak, H., Knippschild, U.: Stages of granulovacu-  
622 lar degeneration: their relation to Alzheimer’s disease and chronic stress  
623 response. *Acta Neuropathologica* **122**(5), 577–589 (2011). [https://doi.  
624 org/10.1007/s00401-011-0871-6](https://doi.org/10.1007/s00401-011-0871-6)
- 625 [8] Mirra, S.S., Heyman, A., McKeel, D., Sumi, S.M., Crain, B.J., Brown-  
626 lee, L.M., Vogel, F.S., Hughes, J.P., Belle, G.v., Berg, L., participating  
627 CERAD neuropathologists: The Consortium to Establish a Registry for  
628 Alzheimer’s Disease (CERAD): Part II. Standardization of the neu-  
629 ropathologic assessment of Alzheimer’s disease. *Neurology* **41**(4), 479–479  
630 (1991). <https://doi.org/10.1212/WNL.41.4.479>. Accessed 2022-03-27
- 631 [9] Hyman, B.T., Phelps, C.H., Beach, T.G., Bigio, E.H., Cairns, N.J.,  
632 Carrillo, M.C., Dickson, D.W., Duyckaerts, C., Frosch, M.P., Masliah,  
633 E., Mirra, S.S., Nelson, P.T., Schneider, J.A., Thal, D.R., Thies, B.,  
634 Trojanowski, J.Q., Vinters, H.V., Montine, T.J.: National Institute on  
635 Aging-Alzheimer’s Association guidelines for the neuropathologic assess-  
636 ment of Alzheimer’s disease. *Alzheimer’s & Dementia* **8**(1), 1–13 (2012).  
637 <https://doi.org/10.1016/j.jalz.2011.10.007>. Accessed 2020-04-21
- 638 [10] Twohig, D., Nielsen, H.M.:  $\alpha$ -synuclein in the pathophysiology of  
639 Alzheimer’s disease. *Molecular Neurodegeneration* **14**(1), 23 (2019). [https:  
640 //doi.org/10.1186/s13024-019-0320-x](https://doi.org/10.1186/s13024-019-0320-x). Accessed 2024-03-09
- 641 [11] Töpferwien, M., Markus, A., Alves, F., Salditt, T.: Contrast enhance-  
642 ment for visualizing neuronal cytoarchitecture by propagation-based x-ray  
643 phase-contrast tomography. *NeuroImage* **199**, 70–80 (2019). [https://doi.  
644 org/10.1016/j.neuroimage.2019.05.043](https://doi.org/10.1016/j.neuroimage.2019.05.043)
- 645 [12] Bosch, C., Ackels, T., Pacureanu, A., Zhang, Y., Peddie, C.J., Bern-  
646 ing, M., Rzepka, N., Zdora, M.-C., Whiteley, I., Storm, M., Bonnin,  
647 A., Rau, C., Margrie, T., Collinson, L., Schaefer, A.T.: Functional and  
648 multiscale 3D structural investigation of brain tissue through correlative  
649 in vivo physiology, synchrotron micro-tomography and volume electron  
650 microscopy. *bioRxiv*, 2021–0113426503 (2021). [https://doi.org/10.1101/  
651 2021.01.13.426503](https://doi.org/10.1101/2021.01.13.426503). Publisher: Cold Spring Harbor Laboratory Section:

New Results

652

653 [13] Kuan, A.T., Phelps, J.S., Thomas, L.A., Nguyen, T.M., Han, J., Chen, C.-  
654 L., Azevedo, A.W., Tuthill, J.C., Funke, J., Cloetens, P., Pacureanu, A.,  
655 Lee, W.-C.A.: Dense neuronal reconstruction through X-ray holographic  
656 nano-tomography. *Nature Neuroscience* **23**(12), 1637–1643 (2020). <https://doi.org/10.1038/s41593-020-0704-9>  
657

658 [14] Barbone, G., Bravin, A., Mittone, A., Pacureanu, A., Mascio, G., Pietro,  
659 P., Kraiger, M., Eckermann, M., Romano, M., Angelis, M., Cloetens, P.,  
660 Bruno, V., Battaglia, G., Coan, P.: X-ray multiscale 3D neuroimaging to  
661 quantify cellular aging and neurodegeneration postmortem in a model of  
662 Alzheimer’s disease. *European Journal of Nuclear Medicine and Molecular*  
663 *Imaging* **49** (2022). <https://doi.org/10.1007/s00259-022-05896-5>

664 [15] Chourrout, M., Roux, M., Boisvert, C., Gislard, C., Legland, D., Arganda-  
665 Carreras, I., OLIVIER, C., PEYRIN, F., Boutin, H., Rama, N., Baron, T.,  
666 Meyronet, D., Brun, E., Rositi, H., Wiart, M., Chauveau, F.: Brain virtual  
667 histology with X-ray phase-contrast tomography Part II: 3D morphologies  
668 of amyloid-beta plaques in Alzheimer’s disease models (2021). <https://doi.org/10.1101/2021.03.25.436908>  
669

670 [16] Chourrout, M., Sandt, C., Weitkamp, T., Dučić, T., Meyronet, D., Baron,  
671 T., Klohs, J., Rama, N., Boutin, H., Singh, S., Olivier, C., Wiart, M.,  
672 Brun, E., Bohic, S., Chauveau, F.: Virtual histology of Alzheimer’s  
673 disease: Biometal entrapment within amyloid- $\beta$  plaques allows for detec-  
674 tion via X-ray phase-contrast imaging. *Acta Biomaterialia* **170**, 260–272  
675 (2023). <https://doi.org/10.1016/j.actbio.2023.07.046>

676 [17] Massimi, L., Bukreeva, I., Santamaria, G., Fratini, M., Corbelli, A., Brun,  
677 F., Fumagalli, S., Maugeri, L., Pacureanu, A., Cloetens, P., Pieroni, N.,  
678 Fiordaliso, F., Forloni, G., Uccelli, A., Kerlero de Rosbo, N., Balducci,  
679 C., Cedola, A.: Exploring Alzheimer’s disease mouse brain through X-ray  
680 phase contrast tomography: From the cell to the organ. *NeuroImage* **184**,  
681 490–495 (2019). <https://doi.org/10.1016/j.neuroimage.2018.09.044>

682 [18] Massimi, L., Pieroni, N., Maugeri, L., Fratini, M., Brun, F., Bukreeva,  
683 I., Santamaria, G., Medici, V., Poloni, T.E., Balducci, C., Cedola, A.:  
684 Assessment of plaque morphology in Alzheimer’s mouse cerebellum using  
685 three-dimensional X-ray phase-based virtual histology. *Scientific Reports*  
686 **10**(1), 11233 (2020). <https://doi.org/10.1038/s41598-020-68045-8>. Num-  
687 ber: 1 Publisher: Nature Publishing Group

688 [19] Palermo, F., Pieroni, N., Sanna, A., Parodi, B., Venturi, C.,  
689 Begani Provinciali, G., Massimi, L., Maugeri, L., Marra, G., Longo, E.,  
690 D’Amico, L., Saccomano, G., Perrin, J., Tromba, G., Bukreeva, I., Fratini,  
691 M., Gigli, G., Rosbo, N., Cedola, A.: Multilevel X-ray imaging approach

- 692 to assess the sequential evolution of multi-organ damage in multiple scler-  
693 rosis. *Communications Physics* **5**, 290 (2022). [https://doi.org/10.1038/](https://doi.org/10.1038/s42005-022-01070-3)  
694 [s42005-022-01070-3](https://doi.org/10.1038/s42005-022-01070-3)
- 695 [20] Chourrout, M., Rositi, H., Ong, E., Hubert, V., Paccalet, A., Foucault, L.,  
696 Autret, A., Fayard, B., Olivier, C., Bolbos, R., Peyrin, F., Crola-da-Silva,  
697 C., Meyronet, D., Raineteau, O., Elleaume, H., Brun, E., Chauveau, F.,  
698 Wiart, M.: Brain virtual histology with X-ray phase-contrast tomograp-  
699 phy Part I: whole-brain myelin mapping in white-matter injury models.  
700 *Biomedical Optics Express* **13**(3), 1620–1639 (2022). [https://doi.org/10.](https://doi.org/10.1364/BOE.438832)  
701 [1364/BOE.438832](https://doi.org/10.1364/BOE.438832). Publisher: Optica Publishing Group
- 702 [21] Cedola, A., Bravin, A., Bukreeva, I., Fratini, M., Pacureanu, A., Mittone,  
703 A., Massimi, L., Cloetens, P., Coan, P., Campi, G., Spanò, R., Brun, F.,  
704 Grigoryev, V., Petrosino, V., Venturi, C., Mastrogiacomo, M., Rosbo, N.,  
705 Uccelli, A.: X-Ray Phase Contrast Tomography Reveals Early Vascular  
706 Alterations and Neuronal Loss in a Multiple Sclerosis Model. *Scientific*  
707 *Reports* **7** (2017). <https://doi.org/10.1038/s41598-017-06251-7>
- 708 [22] Dahlin, L.B., Rix, K.R., Dahl, V.A., Dahl, A.B., Jensen, J.N., Cloetens,  
709 P., Pacureanu, A., Mohseni, S., Thomsen, N.O.B., Bech, M.: Three-  
710 dimensional architecture of human diabetic peripheral nerves revealed  
711 by X-ray phase contrast holographic nanotomography. *Scientific Reports*  
712 **10**(1), 7592 (2020). <https://doi.org/10.1038/s41598-020-64430-5>. Num-  
713 ber: 1 Publisher: Nature Publishing Group
- 714 [23] Töpperwien, M., van der Meer, F., Stadelmann, C., Salditt, T.: Cor-  
715 relative x-ray phase-contrast tomography and histology of human brain  
716 tissue affected by Alzheimer’s disease. *NeuroImage* **210**, 116523 (2020).  
717 <https://doi.org/10.1016/j.neuroimage.2020.116523>
- 718 [24] Frost, J., Schmitzer, B., Töpperwien, M., Eckermann, M., Franz, J.,  
719 Stadelmann, C., Salditt, T.: 3d virtual histology reveals pathological alter-  
720 ations of cerebellar granule cells in multiple sclerosis. preprint, *Pathology*  
721 (October 2022). <https://doi.org/10.1101/2022.10.07.22280811>
- 722 [25] Töpperwien, M., van der Meer, F., Stadelmann, C., Salditt, T.: Three-  
723 dimensional virtual histology of human cerebellum by X-ray phase-  
724 contrast tomography. *Proceedings of the National Academy of Sciences*  
725 *of the United States of America* **115**(27), 6940–6945 (2018). [https://doi.](https://doi.org/10.1073/pnas.1801678115)  
726 [org/10.1073/pnas.1801678115](https://doi.org/10.1073/pnas.1801678115)
- 727 [26] Eckermann, M., Meer, F.v.d., Cloetens, P., Ruhwedel, T., Möbius, W.,  
728 Stadelmann, C., Salditt, T.: Three-dimensional virtual histology of the  
729 cerebral cortex based on phase-contrast X-ray tomography. *Biomedical*  
730 *Optics Express* **12**(12), 7582–7598 (2021). [https://doi.org/10.1364/BOE.](https://doi.org/10.1364/BOE.434885)  
731 [434885](https://doi.org/10.1364/BOE.434885). Publisher: Optica Publishing Group

- 732 [27] Walsh, C.L., Tafforeau, P., Wagner, W.L., Jafree, D.J., Bellier, A., Wer-  
733 lein, C., Kühnel, M.P., Boller, E., Walker-Samuel, S., Robertus, J.L.,  
734 Long, D.A., Jacob, J., Marussi, S., Brown, E., Holroyd, N., Jonigk,  
735 D.D., Ackermann, M., Lee, P.D.: Imaging intact human organs with local  
736 resolution of cellular structures using hierarchical phase-contrast tomogra-  
737 phy. *Nature Methods* **18**(12), 1532–1541 (2021). [https://doi.org/10.1038/](https://doi.org/10.1038/s41592-021-01317-x)  
738 [s41592-021-01317-x](https://doi.org/10.1038/s41592-021-01317-x). Number: 12 Publisher: Nature Publishing Group
- 739 [28] Shahmoradian, S.H., Lewis, A.J., Genoud, C., Hench, J., Moors, T.E.,  
740 Navarro, P.P., Castaño-Díez, D., Schweighauser, G., Graff-Meyer, A.,  
741 Goldie, K.N., Sütterlin, R., Huisman, E., Ingrassia, A., Gier, Y.d.,  
742 Rozemuller, A.J.M., Wang, J., Paepe, A.D., Erny, J., Staempfli, A.,  
743 Hoernschemeyer, J., Großerüschkamp, F., Niedieker, D., El-Mashtoly,  
744 S.F., Quadri, M., Van IJcken, W.F.J., Bonifati, V., Gerwert, K.,  
745 Bohrmann, B., Frank, S., Britschgi, M., Stahlberg, H., Van de Berg,  
746 W.D.J., Lauer, M.E.: Lewy pathology in Parkinson’s disease consists  
747 of crowded organelles and lipid membranes. *Nature Neuroscience* **22**(7),  
748 1099–1109 (2019). <https://doi.org/10.1038/s41593-019-0423-2>. Number:  
749 7 Publisher: Nature Publishing Group
- 750 [29] Kanazawa, T., Uchihara, T., Takahashi, A., Nakamura, A., Orimo, S.,  
751 Mizusawa, H.: Three-Layered Structure Shared Between Lewy Bodies  
752 and Lewy Neurites—Three-Dimensional Reconstruction of Triple-Labeled  
753 Sections. *Brain Pathology* **18**(3), 415–422 (2008). [https://doi.org/10.](https://doi.org/10.1111/j.1750-3639.2008.00140.x)  
754 [1111/j.1750-3639.2008.00140.x](https://doi.org/10.1111/j.1750-3639.2008.00140.x). Accessed 2024-02-16
- 755 [30] Halliday, G.M., Ophof, A., Broe, M., Jensen, P.H., Kettle, E., Fedorow,  
756 H., Cartwright, M.I., Griffiths, F.M., Shepherd, C.E., Double, K.L.:  $\alpha$ -  
757 Synuclein redistributes to neuromelanin lipid in the substantia nigra early  
758 in Parkinson’s disease. *Brain* **128**(11), 2654–2664 (2005). [https://doi.org/](https://doi.org/10.1093/brain/awh584)  
759 [10.1093/brain/awh584](https://doi.org/10.1093/brain/awh584). Accessed 2024-02-16
- 760 [31] Zucca, F.A., Vanna, R., Cupaioli, F.A., Bellei, C., De Palma, A., Di Sil-  
761 vestre, D., Mauri, P., Grassi, S., Prinetti, A., Casella, L., Sulzer, D., Zecca,  
762 L.: Neuromelanin organelles are specialized autolysosomes that accumu-  
763 late undegraded proteins and lipids in aging human brain and are likely  
764 involved in Parkinson’s disease. *npj Parkinson’s Disease* **4**(1), 17 (2018).  
765 <https://doi.org/10.1038/s41531-018-0050-8>. Accessed 2024-02-16
- 766 [32] Vila, M.: Neuromelanin, aging, and neuronal vulnerability in Parkinson’s  
767 disease. *Movement Disorders* **34**(10), 1440–1451 (2019). [https://doi.org/](https://doi.org/10.1002/mds.27776)  
768 [10.1002/mds.27776](https://doi.org/10.1002/mds.27776). Accessed 2024-02-16
- 769 [33] Viceconte, N., Burguillos, M.A., Herrera, A.J., De Pablos, R.M., Joseph,  
770 B., Venero, J.L.: Neuromelanin activates proinflammatory microglia  
771 through a caspase-8-dependent mechanism. *Journal of Neuroinflammation*

- 772 **12**(1), 5 (2015). <https://doi.org/10.1186/s12974-014-0228-x>. Accessed  
773 2024-02-16
- 774 [34] Stadelmann, C., Deckwerth, T.L., Srinivasan, A., Bancher, C., Brück, W.,  
775 Jellinger, K., Lassmann, H.: Activation of Caspase-3 in Single Neurons  
776 and Autophagic Granules of Granulovacuolar Degeneration in Alzheimer's  
777 Disease. *The American Journal of Pathology* **155**(5), 1459–1466 (1999).  
778 [https://doi.org/10.1016/S0002-9440\(10\)65460-0](https://doi.org/10.1016/S0002-9440(10)65460-0). Accessed 2024-04-05
- 779 [35] Koper, M.J., Tomé, S.O., Gawor, K., Belet, A., Van Schoor, E., Schaever-  
780 beke, J., Vandenberghe, R., Vandembulcke, M., Ghebremedhin, E., Otto,  
781 M., Von Arnim, C.A.F., Balusu, S., Blaschko, M.B., De Strooper, B., Thal,  
782 D.R.: LATE-NC aggravates GVD-mediated necroptosis in Alzheimer's  
783 disease. *Acta Neuropathologica Communications* **10**(1), 128 (2022). <https://doi.org/10.1186/s40478-022-01432-6>. Accessed 2024-02-16  
784
- 785 [36] Granulovacuolar degeneration bodies are neuron-selective lysosomal  
786 structures induced by intracellular tau pathology **138**
- 787 [37] Van Dyck, C.H., Swanson, C.J., Aisen, P., Bateman, R.J., Chen, C.,  
788 Gee, M., Kanekiyo, M., Li, D., Reyderman, L., Cohen, S., Froelich, L.,  
789 Katayama, S., Sabbagh, M., Vellas, B., Watson, D., Dhadda, S., Irizarry,  
790 M., Kramer, L.D., Iwatsubo, T.: Lecanemab in Early Alzheimer's Dis-  
791 ease. *New England Journal of Medicine* **388**(1), 9–21 (2023). <https://doi.org/10.1056/NEJMoa2212948>. Accessed 2024-04-05  
792
- 793 [38] Khimchenko, A., Deyhle, H., Schulz, G., Schweighauser, G., Hench,  
794 J., Chicherova, N., Bikis, C., Hieber, S.E., Müller, B.: Extending two-  
795 dimensional histology into the third dimension through conventional  
796 micro computed tomography. *NeuroImage* **139**, 26–36 (2016). <https://doi.org/10.1016/j.neuroimage.2016.06.005>  
797
- 798 [39] Spillantini, M.G., Crowther, R.A., Jakes, R., Hasegawa, M., Goedert,  
799 M.:  $\alpha$ -Synuclein in filamentous inclusions of Lewy bodies from Parkin-  
800 son's disease and dementia with Lewy bodies. *Proceedings of the National*  
801 *Academy of Sciences of the United States of America* **95**(11), 6469–6473  
802 (1998)
- 803 [40] Duffy, P.E., Tennyson, V.M.: Phase and Electron Microscopic Observa-  
804 tions of Lewy Bodies and Melanin Granules in the Substantia Nigra and  
805 Locus Caeruleus in Parkinson's Disease\*†. *Journal of Neuropathology &*  
806 *Experimental Neurology* **24**(3), 398–414 (1965). <https://doi.org/10.1097/00005072-196507000-00003>  
807
- 808 [41] Izumiyama, N., Ohtsubo, K., Tachikawa, T., Nakamura, H.: Elucidation  
809 of three-dimensional ultrastructure of Hirano bodies by the quick-freeze,  
810 deep-etch and replica method. *Acta Neuropathologica* **81**(3), 248–254



- 811 (1991). <https://doi.org/10.1007/BF00305865>. Accessed 2024-02-16
- 812 [42] Ikeda, K., Haga, C., Oyanagi, S., Iritani, S., Kosaka, K.: Ultrastructural  
813 and immunohistochemical study of degenerate neurite-bearing ghost tan-  
814 gles. *Journal of Neurology* **239**(4), 191–194 (1992). [https://doi.org/10.](https://doi.org/10.1007/BF00839138)  
815 [1007/BF00839138](https://doi.org/10.1007/BF00839138). Accessed 2024-02-16
- 816 [43] Pappolla, M.A., Alzofon, J., McMahon, J., Theodoropoulos, T.J.: Ultra-  
817 structural evidence that insoluble microtubules are components of the  
818 neurofibrillary tangle. *European Archives of Psychiatry and Neurological*  
819 *Sciences* **239**(5), 314–319 (1990). <https://doi.org/10.1007/BF01735057>.  
820 Accessed 2024-02-16
- 821 [44] Benda, A., Aitken, H., Davies, D.S., Whan, R., Goldsbury, C.: STED  
822 imaging of tau filaments in Alzheimer’s disease cortical grey matter. *Jour-*  
823 *nal of Structural Biology* **195**(3), 345–352 (2016). [https://doi.org/10.](https://doi.org/10.1016/j.jsb.2016.07.003)  
824 [1016/j.jsb.2016.07.003](https://doi.org/10.1016/j.jsb.2016.07.003). Accessed 2024-04-10
- 825 [45] Fitzpatrick, A.W.P., Falcon, B., He, S., Murzin, A.G., Murshudov,  
826 G., Garringer, H.J., Crowther, R.A., Ghetti, B., Goedert, M., Scheres,  
827 S.H.W.: Cryo-EM structures of tau filaments from Alzheimer’s disease.  
828 *Nature* **547**(7662), 185–190 (2017). <https://doi.org/10.1038/nature23002>.  
829 Accessed 2024-03-09
- 830 [46] Monaco, F., Hubert, M., Da Silva, J.C., Favre-Nicolin, V., Montinaro,  
831 D., Cloetens, P., Laurencin, J.: A comparison between holographic and  
832 near-field ptychographic X-ray tomography for solid oxide cell materials.  
833 *Materials Characterization* **187**, 111834 (2022). [https://doi.org/10.1016/](https://doi.org/10.1016/j.matchar.2022.111834)  
834 [j.matchar.2022.111834](https://doi.org/10.1016/j.matchar.2022.111834)
- 835 [47] Gerhardt, B., Klaue, K., Eigen, L., Schwarz, J., Hecht, S., Brecht, M.: DiI-  
836 CT—A bimodal neural tracer for X-ray and fluorescence imaging. *Cell*  
837 *Reports Methods* **3**(6), 100486 (2023). [https://doi.org/10.1016/j.crmeth.](https://doi.org/10.1016/j.crmeth.2023.100486)  
838 [2023.100486](https://doi.org/10.1016/j.crmeth.2023.100486)
- 839 [48] Busse, M., Marcinişzyn, J.P., Ferstl, S., Kimm, M.A., Pfeiffer, F., Gulder,  
840 T.: 3D-Non-destructive Imaging through Heavy-Metal Eosin Salt Con-  
841 trast Agents. *Chemistry – A European Journal* **27**(14), 4561–4566 (2021).  
842 <https://doi.org/10.1002/chem.202005203>. eprint: [https://chemistry-](https://chemistry-europe.onlinelibrary.wiley.com/doi/pdf/10.1002/chem.202005203)  
843 [europe.onlinelibrary.wiley.com/doi/pdf/10.1002/chem.202005203](https://chemistry-europe.onlinelibrary.wiley.com/doi/pdf/10.1002/chem.202005203)
- 844 [49] Kong, H., Zhang, J., Li, J., Wang, J., Shin, H.-J., Tai, R., Yan, Q., Xia,  
845 K., Hu, J., Wang, L., Zhu, Y., Fan, C.: Genetically encoded X-ray cellular  
846 imaging for nanoscale protein localization. *National Science Review* **7**(7),  
847 1218–1227 (2020). <https://doi.org/10.1093/nsr/nwaa055>
- 848 [50] Reichmann, J., Ruhwedel, T., Möbius, W., Salditt, T.: Neodymium

- 849 acetate as a contrast agent for x-ray phase-contrast tomography. In: Develop-  
850 ments in X-Ray Tomography XIV, vol. 12242, pp. 8–23. SPIE, ???  
851 (2022). <https://doi.org/10.1117/12.2627682>
- 852 [51] Frohn, J., Pinkert-Leetsch, D., Missbach-Güntner, J., Reichardt, M.,  
853 Osterhoff, M., Alves, F., Salditt, T.: 3D virtual histology of human pan-  
854 creatic tissue by multiscale phase-contrast X-ray tomography. *Journal of*  
855 *Synchrotron Radiation* **27**, 1707–1719 (2020). [https://doi.org/10.1107/](https://doi.org/10.1107/S1600577520011327)  
856 [S1600577520011327](https://doi.org/10.1107/S1600577520011327)
- 857 [52] Hubert, M., Pacureanu, A., Guilloud, C., Yang, Y., da Silva, J.C.,  
858 Laurencin, J., Lefebvre-Joud, F., Cloetens, P.: Efficient correction of  
859 wavefront inhomogeneities in X-ray holographic nanotomography by ran-  
860 dom sample displacement. *Applied Physics Letters* **112**(20), 203704  
861 (2018). <https://doi.org/10.1063/1.5026462>. Publisher: American Institute  
862 of Physics
- 863 [53] Cloetens, P., Ludwig, W., Baruchel, J., Van Dyck, D., Van Landuyt,  
864 J., Guigay, J.P., Schlenker, M.: Holotomography: Quantitative phase  
865 tomography with micrometer resolution using hard synchrotron radia-  
866 tion x rays. *Applied Physics Letters* **75**(19), 2912–2914 (1999). <https://doi.org/10.1063/1.125225>  
867
- 868 [54] Langer, M., Cloetens, P., Guigay, J.-P., Peyrin, F.: Quantitative compari-  
869 son of direct phase retrieval algorithms in in-line phase tomography. *Medi-  
870 cal Physics* **35**(10), 4556–4566 (2008). <https://doi.org/10.1118/1.2975224>.  
871 eprint: <https://onlinelibrary.wiley.com/doi/pdf/10.1118/1.2975224>
- 872 [55] Huhn, S., Lohse, L.M., Lucht, J., Salditt, T.: Fast algorithms  
873 for nonlinear and constrained phase retrieval in near-field X-  
874 ray holography based on Tikhonov regularization. Technical Report  
875 arXiv:2205.01099, arXiv (May 2022). [https://doi.org/10.48550/arXiv.](https://doi.org/10.48550/arXiv.2205.01099)  
876 [2205.01099](https://doi.org/10.48550/arXiv.2205.01099). arXiv:2205.01099 [physics] type: article
- 877 [56] Yu, B., Weber, L., Pacureanu, A., Langer, M., Olivier, C., Cloetens,  
878 P., Peyrin, F.: Evaluation of phase retrieval approaches in magnified  
879 X-ray phase nano computerized tomography applied to bone tissue.  
880 *Optics Express* **26**(9), 11110–11124 (2018). [https://doi.org/10.1364/OE.](https://doi.org/10.1364/OE.26.011110)  
881 [26.011110](https://doi.org/10.1364/OE.26.011110). Publisher: Optica Publishing Group
- 882 [57] Feldkamp, L.A., Davis, L.C., Kress, J.W.: Practical cone-beam algorithm.  
883 *Journal of the Optical Society of America A* **1**(6), 612 (1984). [https://](https://doi.org/10.1364/JOSAA.1.000612)  
884 [doi.org/10.1364/JOSAA.1.000612](https://doi.org/10.1364/JOSAA.1.000612)
- 885 [58] van Aarle, W., Palenstijn, W.J., De Beenhouwer, J., Altantzis, T.,  
886 Bals, S., Batenburg, K.J., Sijbers, J.: The ASTRA Toolbox: A platform



- 887 for advanced algorithm development in electron tomography. Ultrami-  
888 croscopy **157**, 35–47 (2015). [https://doi.org/10.1016/j.ultramic.2015.05.](https://doi.org/10.1016/j.ultramic.2015.05.002)  
889 [002](https://doi.org/10.1016/j.ultramic.2015.05.002)
- 890 [59] Lohse, L., Robisch, A.-L., Töpperwien, M., Maretzke, S., Krenkel, M.,  
891 Hagemann, J., Salditt, T.: A phase-retrieval toolbox for X-ray holography  
892 and tomography. *Journal of Synchrotron Radiation* **27** (2020). [https://](https://doi.org/10.1107/S1600577520002398)  
893 [doi.org/10.1107/S1600577520002398](https://doi.org/10.1107/S1600577520002398)
- 894 [60] Boergens, K.M., Berning, M., Bocklisch, T., Bräunlein, D., Drawitsch,  
895 F., Frohnhofen, J., Herold, T., Otto, P., Rzepka, N., Werkmeister, T.,  
896 Werner, D., Wiese, G., Wissler, H., Helmstaedter, M.: webKnossos: effi-  
897 cient online 3D data annotation for connectomics. *Nature Methods* **14**(7),  
898 691–694 (2017). <https://doi.org/10.1038/nmeth.4331>. Publisher: Nature  
899 Publishing Group. Accessed 2024-03-22
- 900 [61] Schindelin, J., Arganda-Carreras, I., Frise, E., Kaynig, V., Longair, M.,  
901 Pietzsch, T., Preibisch, S., Rueden, C., Saalfeld, S., Schmid, B., Tine-  
902 vez, J.-Y., White, D.J., Hartenstein, V., Eliceiri, K., Tomancak, P.,  
903 Cardona, A.: Fiji: an open-source platform for biological-image analysis.  
904 *Nature Methods* **9**(7), 676–682 (2012). [https://doi.org/10.1038/nmeth.](https://doi.org/10.1038/nmeth.2019)  
905 [2019](https://doi.org/10.1038/nmeth.2019). Number: 7 Publisher: Nature Publishing Group
- 906 [62] Bankhead, P., Loughrey, M.B., Fernández, J.A., Dombrowski, Y., McArt,  
907 D.G., Dunne, P.D., McQuaid, S., Gray, R.T., Murray, L.J., Coleman,  
908 H.G., James, J.A., Salto-Tellez, M., Hamilton, P.W.: QuPath: Open  
909 source software for digital pathology image analysis. *Scientific Reports*  
910 **7**(1), 1–7 (2017). <https://doi.org/10.1038/s41598-017-17204-5>
