# 3D imaging of protein aggregates in human neurodegeneration by multiscale X-ray phase-contrast tomography

Jakob Reichmann<sup>1†</sup>, Jonas Franz<sup>2†</sup>, Marina Eckermann<sup>3</sup>, Christine Stadelmann<sup>2\*</sup> and Tim Salditt<sup>1\*</sup>

<sup>1</sup>Institute for X-ray Physics, University of Göttingen, Friedrich-Hund-Straße 1, Göttingen, 37077, Lower Saxony, Germany.

<sup>2</sup>Institute of Neuropathology, Göttingen University Medical Center, Robert-Koch-Straße 40, Göttingen, 37075, Lower Saxony, Germany.

<sup>3</sup>ESRF, The European Synchrotron Radiation Facility, 71 Av. des Martyrs, Grenoble, 38000, Auvergne-Rhône-Alpes, France.

\*Corresponding author(s). E-mail(s):

[cstadelmann@med.uni-goettingen.de](mailto:cstadelmann@med.uni-goettingen.de); [tsaldit@gwdg.de](mailto:tsaldit@gwdg.de);

Contributing authors: [jakob.reichmann@uni-goettingen.de](mailto:jakob.reichmann@uni-goettingen.de);  
[jonas.franz@med.uni-goettingen.de](mailto:jonas.franz@med.uni-goettingen.de); [marina.eckermann@esrf.fr](mailto:marina.eckermann@esrf.fr);

<sup>†</sup>These authors contributed equally to this work.

## Abstract

This study leverages X-ray Phase-Contrast Tomography (XPCT) for detailed analysis of neurodegenerative diseases like Alzheimer's and Parkinson's, focusing on the 3D visualization and quantification of neuropathological features within fixed human postmortem tissue. XPCT, utilizing synchrotron radiation, offers micrometer and even sub-micron resolution, enabling the examination of intraneuronal aggregates—Lewy bodies, granulovacuolar degeneration, Hirano bodies, and neurofibrillary tangles—and extracellular amyloid plaques and cerebral amyloid angiopathy in the fixed human tissue. This approach surpasses aspects of traditional histology, integrating with neuropathology workflows for the identification and high-resolution

31 study of these features. It facilitates correlative studies and quanti-  
32 tative electron density assessments, providing insights into the struc-  
33 tural composition and distribution of neurodegenerative pathologies.

34 **Keywords:** neurodegeneration, x-ray phase-contrast tomography,  
35 nano-imaging, holotomography, neuroimaging

## 36 1 Introduction

37 Neurodegenerative diseases are characterized by specific cellular and extra-  
38 cellular protein aggregates. Studying their three-dimensional (3D) subcellular  
39 localization and their structural composition is crucial to gain further insights  
40 into ongoing pathological processes. Alzheimer's disease (AD) and Parkinson's  
41 disease (PD) are the most prevalent neurodegenerative diseases and both are  
42 characterized by intraneuronal aggregates consisting of tau aggregates in AD  
43 or  $\alpha$ -Synuclein aggregates in PD. To date, the comprehensive visualization and  
44 quantitative assessment of these neuronal aggregates, alongside extracellular  
45 amyloid plaques (in AD) or co-occurring cerebral amyloid angiopathy (CAA),  
46 within a three-dimensional histological context has remained technologically  
47 challenging. The coexistence of these pathologies in approximately 50% of  
48 either AD or PD cases underscores the need for a unified method enabling  
49 quantitative assessment of all these pathological features at subcellular reso-  
50 lution with comparable quality to conventional histology [1, 2].

51 This gap between demand and capability of 3D histological imaging has  
52 recently been closed by X-ray phase contrast tomography (XPCT). As a non-  
53 destructive X-ray technique it offers high penetration, scalable resolution and  
54 contrast for unstained native, liquid or paraffin embedded tissue [3–5]. Based  
55 on high spatial coherence of synchrotron radiation (SR), and even laboratory  
56  $\mu$ -focus sources, XPCT exploits phase contrast arising from free space wave  
57 propagation, and applicability for studies of neurodegenerative diseases has  
58 been demonstrated both for animal models as well as for human tissue, from  
59 autopsy or biopsy. For AD models in mice, for example, XPCT allowed the  
60 quantification of cellular quantify cellular aging [6] and the assessment of  
61 plaque morphology [7, 8] in mouse cerebellum [9, 10]. Further, XPCT was  
62 used to track neuronal loss and sequential evolution of multi-organ damage in  
63 an experimental autoimmune encephalomyelitis (EAE) model[11–13]. Beyond  
64 animal models, investigation of biopsies of human neuronal tissue by XPCT  
65 [14] - also denoted as virtual histology - was used in [15] to resolve sub- $\mu$ m  
66 structures in the cerebellum, with notable changes in the cytoarchitecture  
67 observed for multiple sclerosis (MS) [16]. In [17], correlative imaging of XPCT  
68 and conventional histology was used to investigate AD related pathologies  
69 of the hippocampal CA1-region, further investigated in [18], where an unex-  
70 pected compactification of granular neurons was reported. On a larger scale,

71 imaging of an entire liquid-embedded human brain was recently demon-  
72 strated, with the possibility to zoom in at certain areas of interest with voxel  
73 sizes down to 1  $\mu m$  [19].

74  
75 In this work, we implement a multi-scale XPCT approach, by combining  
76 parallel and cone beam illumination with highly coherent 3rd and 4th gener-  
77 ation synchrotron beams to cover a wide range of scales, and to achieve high  
78 quality reconstruction of human neuronal tissue, based on optimized optics,  
79 phase retrieval and reconstruction, see Fig.1 for an overview over the experi-  
80 mental approach (supplement for detailed experimental setup). We first scan  
81 larger volumes of paraffin embedded tissue, fully compatible with conventional  
82 neuropathology workflows, to identify regions of interest e.g. by immunohis-  
83 tochemistry. We then study these structures of interest at high resolution  
84 by zoom tomography in their native full three dimensionality, including here  
85 intraneuronal aggregates like Lewy bodies (LB), granulovacuolar degeneration  
86 (GVD), Hirano bodies (HB) and neurofibrillary tangles (NFTs) as well as  
87 extracellular  $\beta$ -amyloid ( $A\beta$ ) plaques and vascular amyloid depositions. Fur-  
88 ther, with the 3D reconstructions obtained by non-destructive XPCT at hand,  
89 we can then carry out as a proof-of-concept correlative investigations by con-  
90 ventional immunohistochemistry. We are even able to compare for the first  
91 time electron density of hallmark pathologies using the quantitative nature of  
92 XPCT.

## 2 Results

Topographical investigation of pathologies of the central nervous system is a difficult task due to the complex and folded three-dimensional architecture of the brain. To develop a three dimensional  $\mu$ -CT-scan method based on X-ray Phase Contrast Tomography (XPCT) for neuropathological studies, a multi-scale approach with microscopic resolution over macroscopic distances is required. The measurements also need to be of comparable quality to classical section based histology of formalin-fixed paraffin embedded (FFPE) tissue blocks. In a label-free approach exploiting the contrast given by varying electron densities in human tissue, we identify hallmark features even of subcellular neurodegenerative pathologies like granulovacuolar degeneration (GVD), Hirano bodies (HB) and Lewy bodies (LB). Additionally, accumulation of amyloid aggregates as found either in extracellular plaques of Alzheimer's disease (AD) patients or cerebral amyloid angiopathy (CAA) are now accessible to three dimensional exploration. Beyond qualitative analysis, this label-free method allows for the quantitative comparison of electron densities across different aggregates, thereby enhancing our understanding of the underlying pathological processes.

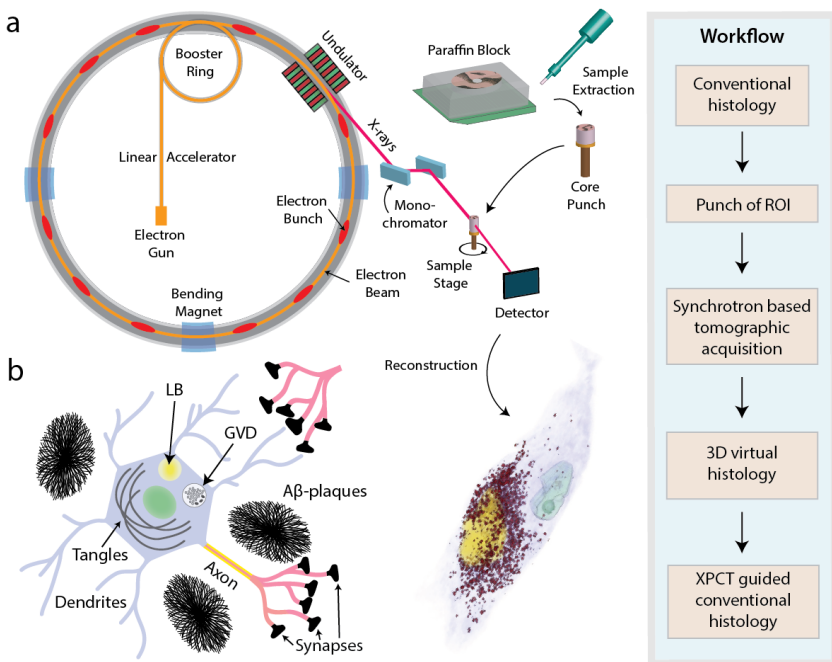

**Fig. 1** Experimental approach. **a** Sample preparation, including biopsy extraction, fixation, dehydration and paraffin wax infiltration. Subsequently, small paraffin biopsies can be extracted from the tissue. **b** Illustration of selected intra- and extracellular dementia specific pathologies and biomarkers.



## 2.1 Subcellular 3D Compartment Analysis of Neurons

### *Lewy Pathology*

Neuromelanin plays a pivotal role in neuroinflammatory processes during progression of Parkinson's disease (PD). Accumulation of neuromelanin granules (NMG) within catecholaminergic neurons is a phenomenon that is most prominent in humans and predominantly occurs in the substantia nigra, thus making any animal model somewhat artificial with regard to this prototypical pathology. To directly study the three dimensional subcellular distribution of LBs and the NGMs in human tissue, a core punch (1 mm diameter) from a FFPE block of the substantia nigra of a PD patient was retrieved and investigated by XPCT. To achieve synchrotron measurements at different scales, a parallel beam setup (SR1 at DESY, Hamburg) for a mesoscopic scale, and a cone beam setup (SR2 at ESRF, Grenoble) to achieve higher magnification, were used. In the 3D reconstruction (Figure 2a), it is observed that LBs are surrounded by a considerable amount of NMGs and that LBs are spatially arranged diametrically with respect to the nucleus. A layered substructure of the LB reveals a dense homogenous core with a less intense surrounding shell.

### *Hirano bodies*

Figure 2b highlights the ability of XPCT to capture the 3D structure of the HBs in human hippocampal tissue, offering perspectives not achievable through conventional histological methods. Remarkably, HBs exhibit a pronounced contrast in XPCT compared to their typically faint appearance in H&E stainings. The representation of Fig. 2b shows the 3D orientation of a Hirano body (orange) with respect to the rest of the cell body (yellow) and the cellular nucleus (blue). A histological (H&E stained) slice of the exact same sample used for XPCT (Figure 2b) confirms the presence of this pathology in HBs in this sample. This first human pathology based 3D representation demonstrates the contact of the HB at the soma of the nerve cell but also shows its disruptive morphology beyond usual nerve cell borders. As known from previous studies Hirano bodies frequently co-occur with granulovacuolar degeneration.

### *Granulovacuolar Degeneration*

Figure 3a presents the findings on granulovacuolar degeneration (GVD) in neurons from the CA1 hippocampal region of an AD patient. Until now, efforts to image the GVD bodies were limited to two-dimensional stained histological sections, other light microscopy techniques, or electron microscopy. Here, we were able to record neurons with GVD in an unstained human tissue block (Figure 3a), exploiting the nano-imaging capabilities at the SR2-setup. Besides being able to visualize the varying densities inside the neuron (Figure 3a), the high resolution, contrast and signal-to-noise ratio allow for a segmentation of single subcellular granules and surrounding vacuoles (Figure 3 (a)). The

6 *High-Resolution Neuroimaging by XPCT*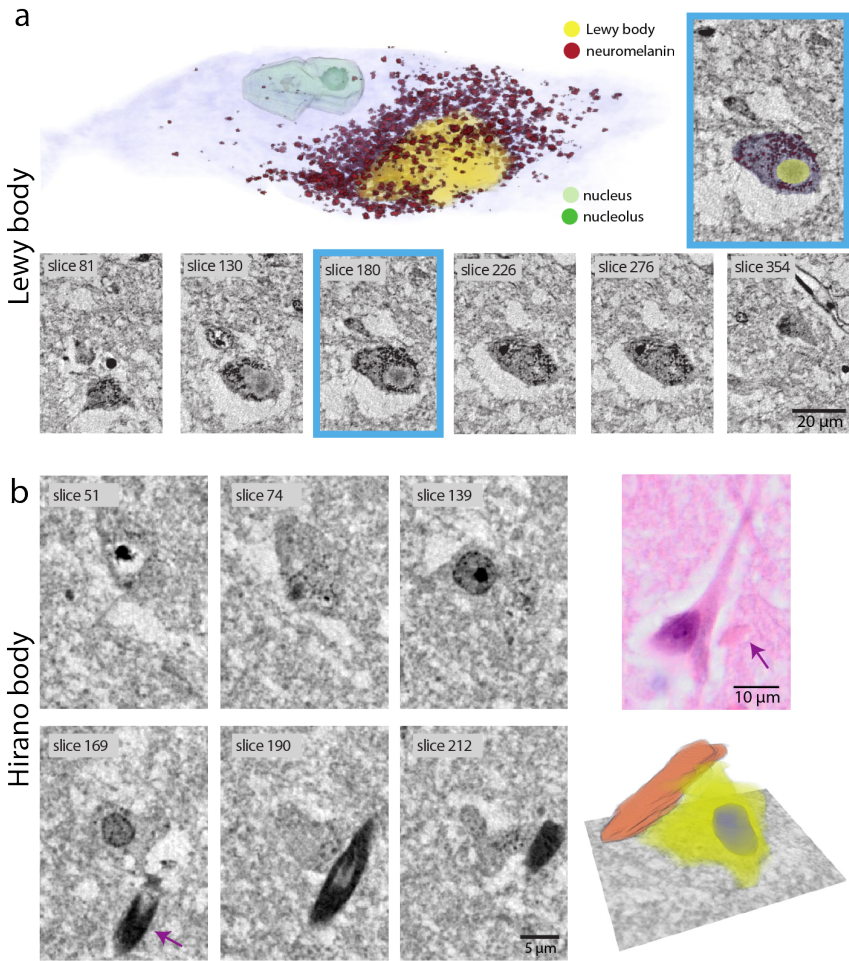

**Fig. 2** Hallmark neuronal pathologies of human neurodegenerative pathologies measured by synchrotron  $\mu$ CT scans (Part 1). **a** Virtual section through the reconstructed volume of a dopaminergic neuron (blue: neuron surface, yellow: Lewy body, red: neuromelanin granules, light green: nucleus, dark green: nucleolus), recorded with the cone beam SR2-setup and exemplary virtual serial slices of a LB. The top right image visualizes quantitatively determined electron densities. **b** 3D Reconstruction of a Hirano body from an AD patient with serial sections (SR2-setup) and a Hirano body in a HE staining from the exact measured tissue block.

153 annotations reveal a large network of vacuoles and granules. It also appears as  
 154 if the neuronal soma is enlarged by many granulovacuoles. Note that GVD was  
 155 also detectable in the large FOV reconstruction obtained from the SR1-setup,  
 156 see the supplemental document.

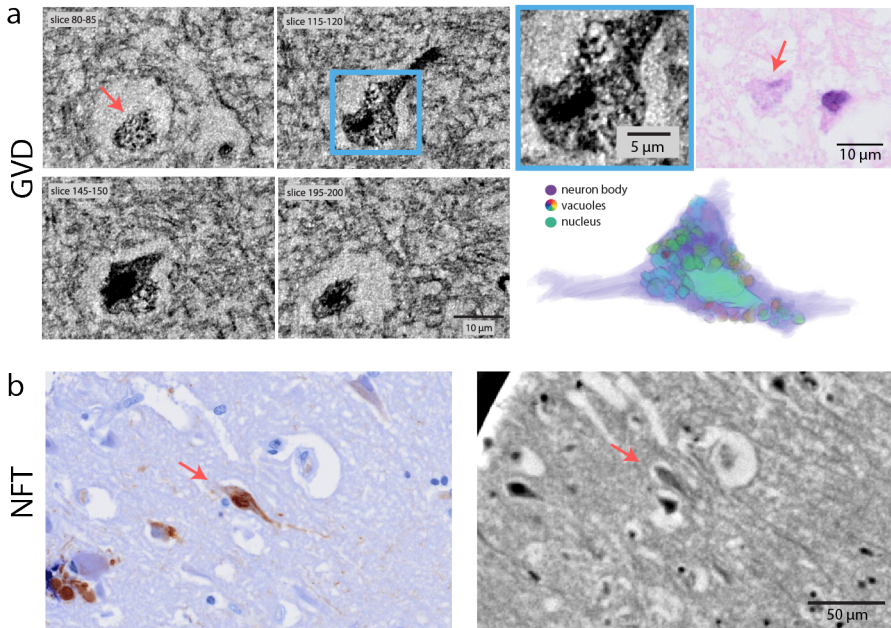

**Fig. 3** Hallmark neuronal pathologies of human neurodegenerative pathologies measured by synchrotron  $\mu$ CT scans (Part 2). **a** 3D rendering of manually segmented granulovacuoles from a CA1 neuron of an AD patient's hippocampus with virtual serial sections of GVD (SR2-setup) and correlative histological slice (H&E). **b** Tangle bearing neurons identified by correlative immunohistochemistry (at8-antibody) and corresponding XPCT scan (SR1-setup).

### 157 *Neurofibrillary Tangles*

158 Neurofibrillary tangles (NFTs) consist of hyperphosphorylated tau aggregates  
 159 and AD cases included in this study were selected to have a high Braak stage  
 160 (5-6). Interestingly, e.g. compared to Hirano or Lewy bodies, the intracellular  
 161 tau-aggregates were difficult to identify in XPCT. To ensure identification of  
 162 single neurons with NFTs, we optimized the correlative immunohistochemical  
 163 (IHC) analysis of the core punches after imaging the sample by the synchrotron.  
 164 A detailed description of the correlation workflow can be found in  
 165 the supplementary document. The staining quality was not reduced, and identifi-  
 166 cation of single tangles by at8 antibody was possible. In a manual image  
 167 registration approach using landmarks like blood vessels, we were able to iden-  
 168 tify the exact neuron both in the XPCT as well as in the IHC stained slice. This  
 169 allowed us to investigate electron density in affected and non-affected neurons  
 170 and revealed only slight compositional heterogeneities of electron densities in  
 171 the soma of affected neurons (Figure 3b). In summary, the pathology of intra-  
 172 neuronal tangles appears less densely packed, particularly when compared to

173 Hirano bodies. Moreover, in contrast to Lewy bodies, the contrast of intraneu-  
174 ronal tangles is not as uniform, making them morphologically challenging to  
175 distinguish from normal neuronal structures.  
176 Additional data on all findings can be found in the supplementary document.

## 177 **2.2 Identification of extracellular and vascular amyloid** 178 **aggregates**

179 Aside from intraneuronal aggregates and their influence on cognitive function,  
180 amyloid- $\beta$  species, which are cleaved extracellular peptides, have been central  
181 to neurodegenerative research for decades and are currently a molecular tar-  
182 get for potential therapies. However, current clinical CT scans still lack the  
183 capability to visualize different amyloid plaques types or detect changes in  
184 small arterioles, veins, or even capillaries e.g. in cerebral amyloid angiopathy  
185 (CAA). In response to the limitations of traditional imaging techniques, our  
186 approach first involves a detailed characterization of amyloid- $\beta$  plaques using  
187 the cone-beam high-resolution setup. Secondly, the capabilities to investigate  
188 CAA with the parallel beam setup are demonstrated.

### 189 *Amyloid Plaques*

190 Extracellular amyloid plaques, characterized by varying amyloid/protein den-  
191 sities, exhibit distinct morphological features. Especially the core of an amyloid  
192 plaque is clearly delineable, even in the parallel beamline of the SR1-setup,  
193 which, with its effective pixel size of 650 nm, enables the study of its 3D dis-  
194 tribution in larger tissue volumes. In this project, the improved resolution  
195 offered by the SR2-setup with a cone beam even allows to identify the shell of  
196 a cored plaque with good contrast compared to the underlying glial matrix,  
197 as visualized in figure 4a. Employing the correlation workflow previously out-  
198 lined, IHC images of stained amyloid plaques (using the 6E10 antibody) were  
199 juxtaposed with the corresponding XPCT measurements. Due to their size,  
200 the same amyloid plaque can easily be identified in both measurements. The  
201 second row of figure 4a displays cored plaques measured in the SR1 beam-  
202 line, clearly identified by correlative immunohistochemistry, and their three  
203 dimensional distribution. In the next step the question arose if with the abil-  
204 ity to detect amyloid plaques also amyloid species in blood vessels would be  
205 accessible to  $\mu$ -CT.

### 206 *Cerebral Amyloid Angiopathy*

207 The amyloid deposits in cerebral amyloid angiopathy (CAA) are also well  
208 detectable by XPCT, even by the SR1-setup, thus enabling a multi-scale  
209 approach. In correlative immunohistochemistry it becomes clear that affected  
210 vessel walls show slightly increased contrast, see figure 4b. The 3D reconstruc-  
211 tion of one exemplary affected small meningeal arteriole demonstrates the  
212 varying vessel diameter. This highly precise  $\mu$ -CT demonstrates a new scale  
213 for identification of even minor blood vessel changes invisible to angiography



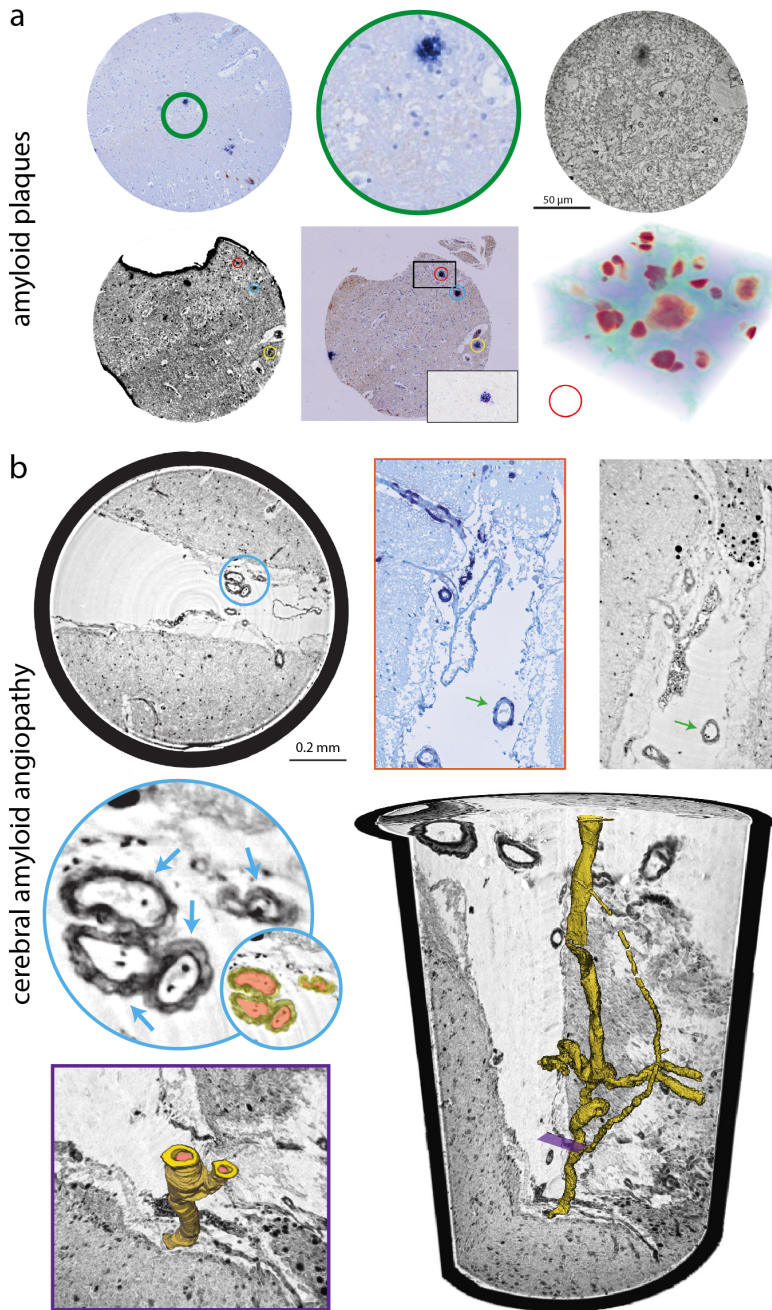

**Fig. 4** Amyloid plaques and Cerebral Amyloid Angiopathy visualized by XPCT. **a** Correlative IHC of beta amyloid positive plaques (6E10, FastBlue) and high resolution XPCT (SR2-setup). Second row low resolution XPCT with correlative IHC (6E10) and three dimensional representation of staining nuclei, blood vessels and plaques. **b** Cerebral Amyloid Angiopathy with correlative histology and 3D rendering of an affected meningeal blood vessel (green arrow).

214 and investigations of branching arteries and arterioles, veins and even of brain  
215 capillaries.

216

217 Additional data on all findings can be found in the supplementary document.

## 218 **2.3 Quantitative Comparison of Electron Densities**

219 Building on the use of X-ray Phase Contrast Tomography (XPCT) to delve  
220 into neurodegenerative pathologies, the electron density of protein aggregates  
221 was studied here featuring various pathological features. Unlike conventional  
222 histology, which relies on staining-specific amplification methods, the image  
223 formation of XPCT is quantitatively linked to the electron density distribu-  
224 tion. Using standardized acquisition and analysis, the electron density can be  
225 calculated from the phase shifts obtained by phase retrieval. Since electron or  
226 effectively mass density effectively mirrors biological parameters such as fib-  
227 ril density or metal involvement, it can provide important information on a  
228 given pathology. Importantly, the standardization allows a direct comparison  
229 of neuronal and extracellular neurodegenerative findings, even across different  
230 diseases (for details on electron density calculation, see supplement).

231 This quantitative approach revealed small inhomogeneities on the scale of 2-3  
232  $\mu\text{m}$  within the Lewy body, suggesting the presence of encased organelles (see  
233 **5a**). Notably, the calculated quantitative electron density revealed a circular  
234 arrangement of hypodense, potentially lysosomal structures at the outer part  
235 of the LB, providing insights into the subcellular composition of this aggregate.  
236 The inherent quantitative capability of XPCT facilitates the assignment of  
237 Hirano bodies to similar electron densities comparable to those observed in  
238 neuromelanin granules (see **5a + b**). This comparison underscores the utility  
239 of XPCT in differentiating between various intracellular aggregates based on  
240 their electron density profiles.

241 Granulovacuolar degeneration in contrast does not display a homogeneous  
242 distribution of electron densities, but it is also not clearly bimodal. This is  
243 suggestive of vacuoles with granules which show a slowly increasing density  
244 towards their core.

245 Lastly the extracellular amyloid plaque seems rather loose and only the core  
246 shows a slight increase in electron density.

247 This analysis not only highlights the heterogeneity within neurodegenerative  
248 pathologies but also emphasizes the potential of quantitative imaging tech-  
249 niques in enhancing our understanding of these diseases at a microstructural  
250 level.

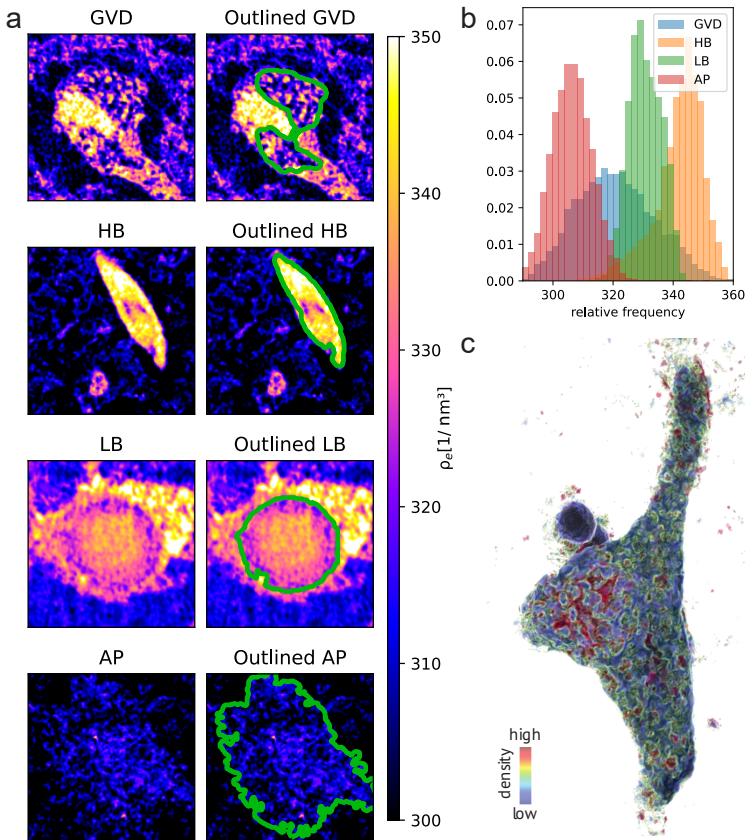

**Fig. 5** Hallmark electron densities of human neurodegenerative pathologies measured by synchrotron XPCT scans. **a** showcases cross-sectional calculated electron densities of neurodegenerative pathologies, with each row representing a different pathology (width of image 20  $\mu\text{m}$ ). The right images feature the same section overlaid with a green ROI delineating the electron density measurement for **b**. Panel **b** presents the electron density histograms for granulovacuolar degeneration (GVD), Hirano bodies (HB), Lewy bodies (LB), and amyloid plaques (AP), illustrating the distribution of electron densities within each pathological feature. Panel **c** depicts a high-resolution calculated electron density image of a neuron with granulovacuolar degeneration, color-coded to represent electron density levels from high (red) to low (blue), highlighting the intricate density variations within GVD.

251

### 3 Discussion

252

253

254

255

256

257

258

259

Protein aggregates are a central hallmark of several neurodegenerative diseases instructing genetic and pathogenetic research; however, their formation, cytoplasmic embedding, and role for neuronal toxicity are not resolved. In this work, we leveraged advanced quantitative imaging, X-ray phase contrast tomography (XPCT), combined with correlative conventional immunohistochemistry to identify and compare in their full three dimensionality (3D) and at sub-cellular scale disease defining pathological protein aggregates. Noteworthy, this is compatible with the standard workflows of clinical pathology

260 for *post mortem* cohorts of patients suffering from neurodegenerative diseases.  
261 This approach enabled us to conduct a quantitative comparison of electron  
262 densities across different aggregates. By combining XPCT with correlative  
263 conventional immunohistochemistry, we are now even able to stain with any  
264 antibody, thereby facilitating accurate identification and measurement of low  
265 electron contrast structures like tangles or vascular amyloid deposits.

266 While the general compatibility of XPCT and FFPE samples has been pre-  
267 viously established [17, 18, 20], we have demonstrated that improvements  
268 in resolution and contrast, facilitated by the specificities of SR2 setup (see  
269 below), are sufficient to identify and to quantify also subcellular neuronal  
270 pathologies, such as Lewy bodies (LB), granulovacuolar degeneration (GVD)  
271 or Hirano bodies (HB). To our knowledge, some of these have never or rarely  
272 been imaged in 3D before. While the 3D inspection alone allowed us to better  
273 understand the nature of the aggregates, the quantitative analysis of XPCT  
274 contrast values revealed significant differences in electron densities between  
275 subcellular aggregates. Note that this requires monochromatic illumination,  
276 and reference values given by the embedding matrix (paraffin), as well as  
277 advanced phase retrieval algorithms [21, 22].

278  
279 By far the highest electron density was found in Hirano bodies. This finding is  
280 in line with previous electron microscopy studies using quick-freeze deep-etch  
281 technology on the ultrastructure of HBs. It was demonstrated that HBs are  
282 intracellular and densely packed fibrillar aggregates [23].

283 Additionally, the size and orientation of protein aggregates relative to the cel-  
284 lular body and nucleus may have significant implications, offering valuable  
285 insights into their development within the cell. For instance, the peculiar ori-  
286 entation of HB revealed through 3D virtual histology by XPCT (see 2b) may  
287 give indications for its mechanism of formation. Likewise, the 3D association of  
288 NM around Lewy bodies observed here (see 2a), is noteworthy, increasing the  
289 evidence for association of alpha-synuclein with neuromelanin pigments from  
290 extensive two dimensional histological studies [24]. The usual size of LB ranges  
291 from 5 to 25  $\mu\text{m}$  in diameter with a dense eosinophilic core of filamenteous and  
292 granular material surrounded by radially oriented filaments [25, 26]. This core  
293 and the filamentous shell are likely to be reflected in the XPCT reconstruction  
294 in form of elevated levels of electron density by XPCT. There is also recent  
295 evidence using confocal as well as super-resolution stimulated emission deple-  
296 tion (STED)-microscopy combined with electron microscopy and tomography  
297 that dense lysosomal structures and a shell of distorted mitochondria surround  
298 some of the LB inclusions (see Fig. 7 of [27]). In this study we are able to iden-  
299 tify even of these LB substructures LBs in terms of electron density, owing to  
300 the increased resolution of the SR2 setup.

301 For the first time, correlative immunohistochemistry (IHC) facilitated, at a sin-  
302 gle cell resolution, the identification of neurons with NFTs in XPCT. Even  
303 though the identification of tangle-bearing neurons in the investigated samples  
304 was not yet possible by XPCT alone, the highly precise measurements and



305 definitive identification of tangles through conventional methods allow us to  
306 draw conclusions. Obviously, compared to HBs and LBs, tangles are not homo-  
307 geneously increasing the electron density of affected neuronal cytoplasm to a  
308 significant level. Comparing this finding to existing electron microscopy studies  
309 demonstrates that NFTs are rather well surrounded by subcellular organelles  
310 and do not fill up densely the neuron [28, 29]. This underscores that XPCT  
311 serves a complementary method to highly advanced cryo-EM resolving atomic  
312 structure of protein-aggregates, for example, in tau-filaments in Alzheimer's  
313 disease [30]. We can now conclude, that the pathology of tangles is mediated  
314 more by stiffening the cytoskeleton and especially the microtubules, obviously  
315 leading to various cellular dysfunctions, rather than by completely replacing  
316 existing subcellular organelles as observed in HBs. It also raises the question  
317 if extended XPCT methods either implementing staining by X-ray contrast  
318 agents or by achievement of even higher resolution will be able to identify  
319 affected pathological tau-filaments. Note that the resolution of XPCT has not  
320 reached its fundamental limits, and can be expected to be further increased  
321 by ongoing instrumental improvements.

322 Correlative IHC further improved our detection sensitivity of  $A\beta$  plaques as  
323 demonstrated by high resolution images of the SR2-setup (see Fig. 4a).  $A\beta$   
324 plaques were recently identified by XPCT in unstained human autopsy brain  
325 tissue by Chourrout et al. [7], reporting varying contrast in mice and human  
326 supposedly depending on the degree of calcium accumulation, in line with  
327 findings by Toepperwien et al. where mineralized plaques could be clearly  
328 observed even with in-house  $\mu$ CT instrumentation [15].

329 Here we are now able to measure the electron density quantitatively. The core  
330 of  $A\beta$  plaques shows a significantly higher electron density while the less dense  
331 shell becomes only barely visible in the high resolution SR2-setup. One may  
332 wonder why some structures like amyloid plaques or tangles in XPCT are  
333 especially difficult to detect. Since for FFPE tissue contrast is generated by  
334 the difference with respect to the embedding paraffin matrix, this can happen  
335 for organelles or structures which happen to exhibit similar density as the  
336 matrix. As a solution, contrast variation by different embedding media can be  
337 employed [3].

338 While the voxel size and instrumental resolution (as determined for high  
339 contrast objects) are clearly sufficient to image the targeted pathologies at  
340 sub-cellular scale, the reconstruction of the FFPE tissue still exhibits sub-  
341 stantial noise. In fact, as explained in the paragraph above, it is the low  
342 contrast of specific features such as unmineralized plaques which limits the  
343 3D structural information gained rather than the instrumental resolution.  
344 For the SR2-setup, in particular, 50 nm (half period) resolution has been  
345 achieved in inorganic samples with high contrast or in metalized biological  
346 specimens [5, 31]. In order to reduce noise and to increase contrast in the  
347 present unlabeled FFPE tissues, one can either increase dose or decrease the  
348 photon energy  $E$ . Since the phase shift  $\Delta\phi$  per resolution element scales with  
349  $E^{-1}$  (away from absorption edges), the contrast increases accordingly. Note

350 that the diameter of the biopsy punches would clearly allow a reduction of  
351  $E$  by at least a factor of two. Future extension of this work may also include  
352 recently developed X-ray stains [32–35] to improve contrast not only for dis-  
353 tinct structural hallmarks of neurodegeneration covered in this work, but also  
354 for the individual cellular components e.g. axons, dendrites or synapses, or  
355 the myelin sheath which would open up a new perspective for X-ray imaging  
356 of myelin-associated diseases, such as multiple sclerosis.

357  
358 While large volumes can be screened systematically in contrast to imaging of  
359 subsequent sections, the relevant targets still have to be identified, and 3D  
360 imaging ideally includes a subsequent targeted zoom capability. Here we have  
361 met this challenge by a multi-scale approach, where large field of view scans  
362 with a parallel undulator beam are combined with zoom tomography based  
363 on cone beam magnification, using a nanofocus optic serving as a secondary  
364 source for holographic imaging. Importantly, the combination of high brilliance  
365 and high resolution scintillators allows for the identification of the features of  
366 interest already in the parallel beam setting (SR1-setup), where 1.5 mm FOV  
367 was scanned with 650 nm voxel size in little more than a minute per scan. Note  
368 that the FOV and volume throughput can be further increased by stitching  
369 several of such scans. We then use high resolution cone beam recordings (SR2-  
370 setup) to image the sub-cellular structures of interest at higher resolution.  
371 The high instrumental stability and unprecedented high flux of this in-vacuum  
372 instrument and sub-50 nm KB nano-focus in combination with elevated photon  
373 flux of  $2 \cdot 10^{11}$  ph/s results in unprecedented image quality for 3D imaging of  
374 pathological hallmarks.

375 Unstained tissue preserved in formalin-fixed paraffin embedded (FFPE) tissue  
376 blocks can be used without further constraints or preparation steps, apart  
377 from punch biopsies with mm-sized diameter to obtain cylindrical specimens  
378 for XPCT. After the non-destructive scans, these can be embedded again, sec-  
379 tioned and inspected by conventional histology, enabling correlative imaging.

380  
381 Finally, beyond *post mortem* autopsies, XPCT based histopathology can also  
382 be performed on human brain tissue collected during surgery. To this end, auto-  
383 mated workflows, remote access and mail-in sample processing are currently  
384 implemented or considered by several synchrotron facilities.

## 385 4 Methods

### 386 *Sample preparation*

387 Human brain tissue from individuals who underwent diagnostic autopsy in  
388 the context of routine clinical care was obtained from the archives of the  
389 Department of Neuropathology UMG in accordance with the UMG ethics  
390 committee. Small brain tissue blocks were dissected from 10% formalin-fixed  
391 brain slices, dehydrated, and paraffin embedded (see [18]). One FFPE tissue

392 block measures about  $2 \times 3 \times 0.3 \text{ cm}^3$ . In total, 11 samples from four individ-  
393 uals were selected for the study, including 8 samples from the hippocampal  
394 CA1 region (four with immunohistochemically confirmed neurofibrillary  
395 tangles (see immunohistochemistry)), one white matter control sample, one  
396 sample from the substantia nigra from a PD patient and one from the cortex  
397 including the leptomeninges of a patient with CAA. Regions of interest were  
398 defined on an adjacent histological section. To prepare the samples for XPCT  
399 image acquisition, cylindrical 1 mm biopsies were extracted from the paraffin  
400 blocks, inserted in a polyimide tube and placed on Huber pins. After imaging  
401 these paraffin blocks were again embedded in paraffin and processed further  
402 for histological or immunohistochemical analysis.

403

#### 404 *Immunohistochemistry*

405 Immunohistochemistry was performed on 1-2  $\mu\text{m}$  thick slices cut from the  
406 paraffin block with a microtome. Pretreatment included hydrogen peroxide  
407 as well as formic acid (98%) (for  $A\beta$  immunohistochemistry only), blocking in  
408 10% normal goat serum as well as heat antigen retrieval (citrate buffer, pH 6).  
409 Primary antibody (tau: mouse, clone at8, Thermo Fisher Scientific, 1:100;  $\beta$ -  
410 Amyloid: mouse, clone 6E10, Zytomed Systems GmbH, 1:500) incubation over  
411 night was followed by secondary antibody incubation either coupled to alkaline  
412 phosphatase (polyclonal goat anti-mouse, Dako, 1:50) or to biotin (monoclonal  
413 sheep anti-mouse, GE Healthcare Life Sciences, 1:100). Slides were developed  
414 using avidin-peroxidase with DAB and/or using the fast blue solution.

#### 415 *Propagation-based phase-contrast imaging at the synchrotron*

416 Synchrotron radiation allows for imaging with high coherence and brilliance  
417 and can cover multiple length scales down to sub-100 nm resolution . In this  
418 work we take advantage of a multiscale XPCT approach, using the paral-  
419 lel beam (SR1) configuration of the GINIX endstation installed at the P10  
420 beamline of the PETRA III storage ring (DESY, Hamburg) [36] and the nano-  
421 imaging beamline (SR2) ID16A (ESRF, Grenoble, France). While the former  
422 is optimized for larger FOV with a parallel beam geometry, the latter is dedi-  
423 cated to propagation-based holographic tomography of biological samples, and  
424 operates in the hard X-ray regime (17-33.6 keV). To achieve high resolutions,  
425 the beam is focused by a pair of Kirkpatrick-Baez (KB) mirrors. Both provide  
426 quantitative phase contrast which allows to retrieve information on the electron  
427 density in the sample, making them especially useful for biomedical applica-  
428 tions. The two configurations can be used complementary to study biological  
429 tissue at multiple scales. Details on the setup and acquisition parameters can  
430 be found in the Supplementary Document.

- 431 • SR1: The imaging procedure involved an overview scan using a field of view  
432 (FOV) of approximately 1.5 mm. Therefore, a parallel-beam configuration  
433 was employed, enabling continuous rotation and resulting in an overall scan

time of approximately 2 minutes. The acquisition of single-distance tomograms involved 3000 projections captured over a 360° rotation. To achieve a well-defined photon energy for studying the tissue, a Si(111) channel-cut monochromator was utilized, eliminating the broad band-pass limitations inherent in in-house CT systems. On the registration side, a high-resolution detection system (Optique Peter, France) with a 50 mm-thick LuAG:Ce scintillator and a 10× magnifying microscope objective [36] was coupled with the sCMOS camera pco.edge 5.5 (PCO, Germany). The camera performs with a maximum frame rate of 100 Hz, utilizing a rolling shutter and fast scan mode. This configuration yielded an effective pixel size of 0.65 μm, with an approximate total exposure time of 96 s. To achieve the desired imaging conditions, certain components such as KB-mirrors, waveguide and the fast shutter were removed from the beam path. Additionally, the beam size was adjusted to approximately 2×2 mm using an upstream slit system (refer to Figure 1d).

- SR2: The nano-imaging beamline ID16A provides a highly-brilliant, low-divergent beam optimal for three dimensional high-resolution imaging of biological samples or other nanomaterials e.g. in batteries. With its multi-layer monochromator and focusing KB-mirrors, it allows for photon energies of either 17.1 or 33.6 keV and a photon flux of up to  $4.1 \cdot 10^{11} \frac{ph}{s}$ . The cone beam geometry enables a magnification of the projected pixels resulting in possible effective pixel sizes  $px_{eff}$  of less than 10 nm. The monochromaticity allows for a subsequent quantitative analysis and retrieval of sample characteristics such as electron density. Due to the strong magnification and high coherence, phase propagation can be very accurately recorded and reconstructed from the strongly holographic projections ( $F \ll 1$ ). For detection, a XIMEA sCMOS based indirect imaging detector with 6144 x 6144 pixel (10 μm physical pixel size) and a 10× magnifying microscope objective was used. In this experiment the projections were binned (3×3), with effective pixel sizes ranging from 90 to 140 nm. 2000 projections were recorded per scan with additional random sample displacement for every angle to correct for wavefront inhomogeneities and therefore avoiding ring artifacts [37]. Tomographic scans were acquired at four distances to account for zero crossings in the CTF phase reconstruction [38]. From the four distances, the one with the highest resolution and largest FOV is combined, resulting in an "extended FOV" of 3216<sup>2</sup> pixel in the resulting tomographic slices (refer to Figure 1e).

### **Data processing**

Projections are acquired and saved using the .tiff or .raw format. After flat field and dark image correction, operating in the holographic regime, phase retrieval was performed using either the contrast transfer function (CTF, [38, 39]), the nonlinear Tikhonov (NLT, [40]) or a Paganin-based iterative

477 scheme [41] (see supplemental document). On the phase retrieved projec-  
478 tions, ring removal techniques were conducted (only random displacement at  
479 SR2-setup) as well as an automatic rotation axis correction. Tomographic  
480 reconstruction was then performed by either filtered back projection (par-  
481 allel beam, SR1) or the Feldkamp-Davis-Kress (FDK, [42]) algorithm. Both  
482 techniques are implemented in the ASTRA-Toolbox [43] for MATLAB and  
483 incorporated into the HolotomoToolbox [22]. Further details on the different  
484 reconstruction schemes can be found in the supplemental document.

485

### 486 *Segmentation and visualization of cell components*

487 After tomographic reconstruction of the recorded, phase-retrieved, projections  
488 and visual inspection by practising pathologists, different structures were pro-  
489 posed for further analysis. After selection, segmentation was conducted using  
490 seeded watershed algorithms, deep learning based techniques (webKnossos  
491 [44], scalable minds GmbH, Potsdam, Germany) or simple thresholding. Sub-  
492 sequently, rendering software such as NVIDIA IndeX (NVIDIA, Santa Clara,  
493 US), Avizo (Thermo Fisher Scientific, Waltham, US) and ZEISS arivis (Carl  
494 Zeiss AG, Oberkochen, Germany) was used for a three-dimensional visualiza-  
495 tion of the dataset. For additional post processing such as orthogonal views  
496 and maximum intensity projections the Fiji software was used [45]. Details on  
497 segmentation can be found in the supplemental document.

### 498 **Data availability**

499 Raw data were generated at ESRF and DESY. Raw data will be released and  
500 made public two years after the beamtime. All treated datasets are available  
501 from the corresponding author on request. Exemplary datasets that sup-  
502 port the findings of this study will be openly available in GRO.data upon  
503 publication.

### 504 **Contribution statement**

505 JR and JF contributed equally to this work. TS, CS, JF and JR conceived the  
506 experiments and analysis. JF selected and prepared the samples. JR, TS con-  
507 ducted the synchrotron experiments, together with ME, acting as local contact  
508 at the ID16A beamline. JR performed data processing, image reconstruction  
509 and visualization. JF annotated data and performed data processing. JR, JF,  
510 and CS interpreted the results in terms of neuropathology. TS, CS, JF and JR  
511 wrote the manuscript. All authors reviewed the manuscript.

### 512 **Acknowledgement**

513 We thank Markus Osterhoff, Michael Sprung and Fabian Westermeier for their  
514 continuous support at the instrument GINIX/P10 (PETRA III, DESY). The  
515 work was funded by the Deutsche Forschungsgemeinschaft (DFG, German

516 Research Foundation) – Project-ID 432680300 – SFB 1456/A03 Mathematics  
 517 of Experiment and EXC 2067/1-390729940. We also acknowledge assistance in  
 518 visualization with NVIDIA IndeX (NVIDIA Corporation, USA).

## 519 References

- 520 [1] Attems, J., Toledo, J.B., Walker, L., Gelpi, E., Gentleman, S., Halli-  
 521 day, G., Hortobagyi, T., Jellinger, K., Kovacs, G.G., Lee, E.B., Love, S.,  
 522 McAleese, K.E., Nelson, P.T., Neumann, M., Parkkinen, L., Polvikoski,  
 523 T., Sikorska, B., Smith, C., Grinberg, L.T., Thal, D.R., Trojanowski,  
 524 J.Q., McKeith, I.G.: Neuropathological consensus criteria for the eval-  
 525 uation of Lewy pathology in post-mortem brains: a multi-centre study.  
 526 *Acta Neuropathologica* **141**(2), 159–172 (2021). [https://doi.org/10.1007/  
 527 s00401-020-02255-2](https://doi.org/10.1007/s00401-020-02255-2). Accessed 2021-03-13
- 528 [2] Twhig, D., Nielsen, H.M.:  $\alpha$ -synuclein in the pathophysiology of  
 529 Alzheimer’s disease. *Molecular Neurodegeneration* **14**(1), 23 (2019). [https://doi.org/  
 530 //doi.org/10.1186/s13024-019-0320-x](https://doi.org/10.1186/s13024-019-0320-x). Accessed 2024-03-09
- 531 [3] Töpperwien, M., Markus, A., Alves, F., Salditt, T.: Contrast enhance-  
 532 ment for visualizing neuronal cytoarchitecture by propagation-based x-ray  
 533 phase-contrast tomography. *NeuroImage* **199**, 70–80 (2019). [https://doi.  
 534 org/10.1016/j.neuroimage.2019.05.043](https://doi.org/10.1016/j.neuroimage.2019.05.043)
- 535 [4] Bosch, C., Ackels, T., Pacureanu, A., Zhang, Y., Peddie, C.J., Bern-  
 536 ing, M., Rzepka, N., Zdora, M.-C., Whiteley, I., Storm, M., Bonnin,  
 537 A., Rau, C., Margrie, T., Collinson, L., Schaefer, A.T.: Functional and  
 538 multiscale 3D structural investigation of brain tissue through correlative  
 539 in vivo physiology, synchrotron micro-tomography and volume electron  
 540 microscopy. *bioRxiv*, 2021–0113426503 (2021). [https://doi.org/10.1101/  
 541 2021.01.13.426503](https://doi.org/10.1101/2021.01.13.426503). Publisher: Cold Spring Harbor Laboratory Section:  
 542 New Results
- 543 [5] Kuan, A.T., Phelps, J.S., Thomas, L.A., Nguyen, T.M., Han, J., Chen, C.-  
 544 L., Azevedo, A.W., Tuthill, J.C., Funke, J., Cloetens, P., Pacureanu, A.,  
 545 Lee, W.-C.A.: Dense neuronal reconstruction through X-ray holographic  
 546 nano-tomography. *Nature Neuroscience* **23**(12), 1637–1643 (2020). [https://doi.org/  
 547 //doi.org/10.1038/s41593-020-0704-9](https://doi.org/10.1038/s41593-020-0704-9)
- 548 [6] Barbone, G., Bravin, A., Mittone, A., Pacureanu, A., Mascio, G., Pietro,  
 549 P., Kraiger, M., Eckermann, M., Romano, M., Angelis, M., Cloetens, P.,  
 550 Bruno, V., Battaglia, G., Coan, P.: X-ray multiscale 3D neuroimaging to  
 551 quantify cellular aging and neurodegeneration postmortem in a model of  
 552 Alzheimer’s disease. *European Journal of Nuclear Medicine and Molecular*  
 553 *Imaging* **49** (2022). <https://doi.org/10.1007/s00259-022-05896-5>

- 554 [7] Chourrout, M., Roux, M., Boisvert, C., Gislard, C., Legland, D., Arganda-  
555 Carreras, I., OLIVIER, C., PEYRIN, F., Boutin, H., Rama, N., Baron, T.,  
556 Meyronet, D., Brun, E., Rositi, H., Wiart, M., Chauveau, F.: Brain virtual  
557 histology with X-ray phase-contrast tomography Part II: 3D morphologies  
558 of amyloid-beta plaques in Alzheimer’s disease models (2021). [https://](https://doi.org/10.1101/2021.03.25.436908)  
559 [doi.org/10.1101/2021.03.25.436908](https://doi.org/10.1101/2021.03.25.436908)
- 560 [8] Chourrout, M., Sandt, C., Weitkamp, T., Dučić, T., Meyronet, D., Baron,  
561 T., Klohs, J., Rama, N., Boutin, H., Singh, S., Olivier, C., Wiart, M.,  
562 Brun, E., Bohic, S., Chauveau, F.: Virtual histology of Alzheimer’s  
563 disease: Biometal entrapment within amyloid- $\beta$  plaques allows for detec-  
564 tion via X-ray phase-contrast imaging. *Acta Biomaterialia* **170**, 260–272  
565 (2023). <https://doi.org/10.1016/j.actbio.2023.07.046>
- 566 [9] Massimi, L., Bukreeva, I., Santamaria, G., Fratini, M., Corbelli, A., Brun,  
567 F., Fumagalli, S., Maugeri, L., Pacureanu, A., Cloetens, P., Pieroni, N.,  
568 Fiordaliso, F., Forloni, G., Uccelli, A., Kerlero de Rosbo, N., Balducci,  
569 C., Cedola, A.: Exploring Alzheimer’s disease mouse brain through X-ray  
570 phase contrast tomography: From the cell to the organ. *NeuroImage* **184**,  
571 490–495 (2019). <https://doi.org/10.1016/j.neuroimage.2018.09.044>
- 572 [10] Massimi, L., Pieroni, N., Maugeri, L., Fratini, M., Brun, F., Bukreeva,  
573 I., Santamaria, G., Medici, V., Poloni, T.E., Balducci, C., Cedola, A.:  
574 Assessment of plaque morphology in Alzheimer’s mouse cerebellum using  
575 three-dimensional X-ray phase-based virtual histology. *Scientific Reports*  
576 **10**(1), 11233 (2020). <https://doi.org/10.1038/s41598-020-68045-8>. Num-  
577 ber: 1 Publisher: Nature Publishing Group
- 578 [11] Palermo, F., Pieroni, N., Sanna, A., Parodi, B., Venturi, C.,  
579 Begani Provinciali, G., Massimi, L., Maugeri, L., Marra, G., Longo, E.,  
580 D’Amico, L., Saccomano, G., Perrin, J., Tromba, G., Bukreeva, I., Fratini,  
581 M., Gigli, G., Rosbo, N., Cedola, A.: Multilevel X-ray imaging approach  
582 to assess the sequential evolution of multi-organ damage in multiple scler-  
583 osis. *Communications Physics* **5**, 290 (2022). [https://doi.org/10.1038/](https://doi.org/10.1038/s42005-022-01070-3)  
584 [s42005-022-01070-3](https://doi.org/10.1038/s42005-022-01070-3)
- 585 [12] Chourrout, M., Rositi, H., Ong, E., Hubert, V., Paccalet, A., Foucault, L.,  
586 Autret, A., Fayard, B., Olivier, C., Bolbos, R., Peyrin, F., Crola-da-Silva,  
587 C., Meyronet, D., Raineteau, O., Elleaume, H., Brun, E., Chauveau, F.,  
588 Wiart, M.: Brain virtual histology with X-ray phase-contrast tomogra-  
589 phy Part I: whole-brain myelin mapping in white-matter injury models.  
590 *Biomedical Optics Express* **13**(3), 1620–1639 (2022). [https://doi.org/10.](https://doi.org/10.1364/BOE.438832)  
591 [1364/BOE.438832](https://doi.org/10.1364/BOE.438832). Publisher: Optica Publishing Group
- 592 [13] Cedola, A., Bravin, A., Bukreeva, I., Fratini, M., Pacureanu, A., Mittone,  
593 A., Massimi, L., Cloetens, P., Coan, P., Campi, G., Spanò, R., Brun, F.,



- 594 Grigoryev, V., Petrosino, V., Venturi, C., Mastrogiacomo, M., Rosbo, N.,  
595 Uccelli, A.: X-Ray Phase Contrast Tomography Reveals Early Vascular  
596 Alterations and Neuronal Loss in a Multiple Sclerosis Model. *Scientific*  
597 *Reports* **7** (2017). <https://doi.org/10.1038/s41598-017-06251-7>
- 598 [14] Dahlin, L.B., Rix, K.R., Dahl, V.A., Dahl, A.B., Jensen, J.N., Cloetens,  
599 P., Pacureanu, A., Mohseni, S., Thomsen, N.O.B., Bech, M.: Three-  
600 dimensional architecture of human diabetic peripheral nerves revealed  
601 by X-ray phase contrast holographic nanotomography. *Scientific Reports*  
602 **10**(1), 7592 (2020). <https://doi.org/10.1038/s41598-020-64430-5>. Num-  
603 ber: 1 Publisher: Nature Publishing Group
- 604 [15] Töpperwien, M., van der Meer, F., Stadelmann, C., Salditt, T.: Cor-  
605 relative x-ray phase-contrast tomography and histology of human brain  
606 tissue affected by Alzheimer’s disease. *NeuroImage* **210**, 116523 (2020).  
607 <https://doi.org/10.1016/j.neuroimage.2020.116523>
- 608 [16] Frost, J., Schmitzer, B., Töpperwien, M., Eckermann, M., Franz, J.,  
609 Stadelmann, C., Salditt, T.: 3d virtual histology reveals pathological alter-  
610 ations of cerebellar granule cells in multiple sclerosis. preprint, *Pathology*  
611 (October 2022). <https://doi.org/10.1101/2022.10.07.22280811>
- 612 [17] Töpperwien, M., van der Meer, F., Stadelmann, C., Salditt, T.: Three-  
613 dimensional virtual histology of human cerebellum by X-ray phase-  
614 contrast tomography. *Proceedings of the National Academy of Sciences*  
615 *of the United States of America* **115**(27), 6940–6945 (2018). [https://doi.](https://doi.org/10.1073/pnas.1801678115)  
616 [org/10.1073/pnas.1801678115](https://doi.org/10.1073/pnas.1801678115)
- 617 [18] Eckermann, M., Meer, F.v.d., Cloetens, P., Ruhwedel, T., Möbius, W.,  
618 Stadelmann, C., Salditt, T.: Three-dimensional virtual histology of the  
619 cerebral cortex based on phase-contrast X-ray tomography. *Biomedical*  
620 *Optics Express* **12**(12), 7582–7598 (2021). [https://doi.org/10.1364/BOE.](https://doi.org/10.1364/BOE.434885)  
621 [434885](https://doi.org/10.1364/BOE.434885). Publisher: Optica Publishing Group
- 622 [19] Walsh, C.L., Tafforeau, P., Wagner, W.L., Jafree, D.J., Bellier, A., Wer-  
623 lein, C., Kühnel, M.P., Boller, E., Walker-Samuel, S., Robertus, J.L.,  
624 Long, D.A., Jacob, J., Marussi, S., Brown, E., Holroyd, N., Jonigk,  
625 D.D., Ackermann, M., Lee, P.D.: Imaging intact human organs with local  
626 resolution of cellular structures using hierarchical phase-contrast tomogra-  
627 phy. *Nature Methods* **18**(12), 1532–1541 (2021). [https://doi.org/10.1038/](https://doi.org/10.1038/s41592-021-01317-x)  
628 [s41592-021-01317-x](https://doi.org/10.1038/s41592-021-01317-x). Number: 12 Publisher: Nature Publishing Group
- 629 [20] Khimchenko, A., Deyhle, H., Schulz, G., Schweighauser, G., Hench,  
630 J., Chicherova, N., Bikis, C., Hieber, S.E., Müller, B.: Extending two-  
631 dimensional histology into the third dimension through conventional  
632 micro computed tomography. *NeuroImage* **139**, 26–36 (2016). [https://](https://doi.org/10.1016/j.neuroimage.2016.06.005)  
633 [doi.org/10.1016/j.neuroimage.2016.06.005](https://doi.org/10.1016/j.neuroimage.2016.06.005)



- 634 [21] Robisch, A.-L., Eckermann, M., Töpperwien, M., Meer, F.v.d.,  
635 Stadelmann-Nessler, C., Salditt, T.: Nanoscale x-ray holotomography of  
636 human brain tissue with phase retrieval based on multienergy recordings.  
637 *Journal of Medical Imaging* **7**(1), 013501 (2020). [https://doi.org/10.1117/](https://doi.org/10.1117/1.JMI.7.1.013501)  
638 [1.JMI.7.1.013501](https://doi.org/10.1117/1.JMI.7.1.013501). Publisher: SPIE
- 639 [22] Lohse, L., Robisch, A.-L., Töpperwien, M., Maretzke, S., Krenkel, M.,  
640 Hagemann, J., Salditt, T.: A phase-retrieval toolbox for X-ray holography  
641 and tomography. *Journal of Synchrotron Radiation* **27** (2020). [https://](https://doi.org/10.1107/S1600577520002398)  
642 [doi.org/10.1107/S1600577520002398](https://doi.org/10.1107/S1600577520002398)
- 643 [23] Izumiyama, N., Ohtsubo, K., Tachikawa, T., Nakamura, H.: Elucidation  
644 of three-dimensional ultrastructure of Hirano bodies by the quick-freeze,  
645 deep-etch and replica method. *Acta Neuropathologica* **81**(3), 248–254  
646 (1991). <https://doi.org/10.1007/BF00305865>. Accessed 2024-02-16
- 647 [24] Halliday, G.M., Ophof, A., Broe, M., Jensen, P.H., Kettle, E., Fedorow,  
648 H., Cartwright, M.I., Griffiths, F.M., Shepherd, C.E., Double, K.L.:  $\alpha$ -  
649 Synuclein redistributes to neuromelanin lipid in the substantia nigra early  
650 in Parkinson’s disease. *Brain* **128**(11), 2654–2664 (2005). [https://doi.org/](https://doi.org/10.1093/brain/awh584)  
651 [10.1093/brain/awh584](https://doi.org/10.1093/brain/awh584). Accessed 2024-02-16
- 652 [25] Spillantini, M.G., Crowther, R.A., Jakes, R., Hasegawa, M., Goedert,  
653 M.:  $\alpha$ -Synuclein in filamentous inclusions of Lewy bodies from Parkin-  
654 son’s disease and dementia with Lewy bodies. *Proceedings of the National*  
655 *Academy of Sciences of the United States of America* **95**(11), 6469–6473  
656 (1998)
- 657 [26] Duffy, P.E., Tennyson, V.M.: Phase and Electron Microscopic Observa-  
658 tions of Lewy Bodies and Melanin Granules in the Substantia Nigra and  
659 Locus Caeruleus in Parkinson’s Disease\*†. *Journal of Neuropathology &*  
660 *Experimental Neurology* **24**(3), 398–414 (1965). [https://doi.org/10.1097/](https://doi.org/10.1097/00005072-196507000-00003)  
661 [00005072-196507000-00003](https://doi.org/10.1097/00005072-196507000-00003)
- 662 [27] Shahmoradian, S.H., Lewis, A.J., Genoud, C., Hench, J., Moors, T.E.,  
663 Navarro, P.P., Castaño-Díez, D., Schweighauser, G., Graff-Meyer, A.,  
664 Goldie, K.N., Sütterlin, R., Huisman, E., Ingrassia, A., Gier, Y.d.,  
665 Rozemuller, A.J.M., Wang, J., Paepe, A.D., Erny, J., Staempfli, A.,  
666 Hoernschemeyer, J., Großerüschkamp, F., Niedieker, D., El-Mashtoly,  
667 S.F., Quadri, M., Van IJcken, W.F.J., Bonifati, V., Gerwert, K.,  
668 Bohrmann, B., Frank, S., Britschgi, M., Stahlberg, H., Van de Berg,  
669 W.D.J., Lauer, M.E.: Lewy pathology in Parkinson’s disease consists  
670 of crowded organelles and lipid membranes. *Nature Neuroscience* **22**(7),  
671 1099–1109 (2019). <https://doi.org/10.1038/s41593-019-0423-2>. Number:  
672 7 Publisher: Nature Publishing Group
- 673 [28] Ikeda, K., Haga, C., Oyanagi, S., Iritani, S., Kosaka, K.: Ultrastructural

- 674 and immunohistochemical study of degenerate neurite-bearing ghost tan-  
675 gles. *Journal of Neurology* **239**(4), 191–194 (1992). [https://doi.org/10.](https://doi.org/10.1007/BF00839138)  
676 [1007/BF00839138](https://doi.org/10.1007/BF00839138). Accessed 2024-02-16
- 677 [29] Pappolla, M.A., Alzofon, J., McMahon, J., Theodoropoulos, T.J.: Ultra-  
678 structural evidence that insoluble microtubules are components of the  
679 neurofibrillary tangle. *European Archives of Psychiatry and Neurological*  
680 *Sciences* **239**(5), 314–319 (1990). <https://doi.org/10.1007/BF01735057>.  
681 Accessed 2024-02-16
- 682 [30] Fitzpatrick, A.W.P., Falcon, B., He, S., Murzin, A.G., Murshudov,  
683 G., Garringer, H.J., Crowther, R.A., Ghetti, B., Goedert, M., Scheres,  
684 S.H.W.: Cryo-EM structures of tau filaments from Alzheimer’s disease.  
685 *Nature* **547**(7662), 185–190 (2017). <https://doi.org/10.1038/nature23002>.  
686 Accessed 2024-03-09
- 687 [31] Monaco, F., Hubert, M., Da Silva, J.C., Favre-Nicolin, V., Montinaro,  
688 D., Cloetens, P., Laurencin, J.: A comparison between holographic and  
689 near-field ptychographic X-ray tomography for solid oxide cell materials.  
690 *Materials Characterization* **187**, 111834 (2022). [https://doi.org/10.1016/](https://doi.org/10.1016/j.matchar.2022.111834)  
691 [j.matchar.2022.111834](https://doi.org/10.1016/j.matchar.2022.111834)
- 692 [32] Gerhardt, B., Klaue, K., Eigen, L., Schwarz, J., Hecht, S., Brecht, M.: DiI-  
693 CT—A bimodal neural tracer for X-ray and fluorescence imaging. *Cell*  
694 *Reports Methods* **3**(6), 100486 (2023). [https://doi.org/10.1016/j.crmeth.](https://doi.org/10.1016/j.crmeth.2023.100486)  
695 [2023.100486](https://doi.org/10.1016/j.crmeth.2023.100486)
- 696 [33] Busse, M., Marcinişzyn, J.P., Ferstl, S., Kimm, M.A., Pfeiffer, F., Gulder,  
697 T.: 3D-Non-destructive Imaging through Heavy-Metal Eosin Salt Con-  
698 trast Agents. *Chemistry – A European Journal* **27**(14), 4561–4566 (2021).  
699 <https://doi.org/10.1002/chem.202005203>. eprint: [https://chemistry-](https://chemistry-europe.onlinelibrary.wiley.com/doi/pdf/10.1002/chem.202005203)  
700 [europe.onlinelibrary.wiley.com/doi/pdf/10.1002/chem.202005203](https://chemistry-europe.onlinelibrary.wiley.com/doi/pdf/10.1002/chem.202005203)
- 701 [34] Kong, H., Zhang, J., Li, J., Wang, J., Shin, H.-J., Tai, R., Yan, Q., Xia,  
702 K., Hu, J., Wang, L., Zhu, Y., Fan, C.: Genetically encoded X-ray cellular  
703 imaging for nanoscale protein localization. *National Science Review* **7**(7),  
704 1218–1227 (2020). <https://doi.org/10.1093/nsr/nwaa055>
- 705 [35] Reichmann, J., Ruhwedel, T., Möbius, W., Salditt, T.: Neodymium  
706 acetate as a contrast agent for x-ray phase-contrast tomography. In: *Devel-*  
707 *opments in X-Ray Tomography XIV*, vol. 12242, pp. 8–23. SPIE, ???  
708 (2022). <https://doi.org/10.1117/12.2627682>
- 709 [36] Frohn, J., Pinkert-Leetsch, D., Missbach-Güntner, J., Reichardt, M.,  
710 Osterhoff, M., Alves, F., Salditt, T.: 3D virtual histology of human pan-  
711 creatic tissue by multiscale phase-contrast X-ray tomography. *Journal of*  
712 *Synchrotron Radiation* **27**, 1707–1719 (2020). <https://doi.org/10.1107/>

S1600577520011327

713

714 [37] Hubert, M., Pacureanu, A., Guilloud, C., Yang, Y., da Silva, J.C.,  
715 Laurencin, J., Lefebvre-Joud, F., Cloetens, P.: Efficient correction of  
716 wavefront inhomogeneities in X-ray holographic nanotomography by ran-  
717 dom sample displacement. *Applied Physics Letters* **112**(20), 203704  
718 (2018). <https://doi.org/10.1063/1.5026462>. Publisher: American Institute  
719 of Physics

720 [38] Cloetens, P., Ludwig, W., Baruchel, J., Van Dyck, D., Van Landuyt,  
721 J., Guigay, J.P., Schlenker, M.: Holotomography: Quantitative phase  
722 tomography with micrometer resolution using hard synchrotron radi-  
723 ation x rays. *Applied Physics Letters* **75**(19), 2912–2914 (1999). <https://doi.org/10.1063/1.125225>  
724

725 [39] Langer, M., Cloetens, P., Guigay, J.-P., Peyrin, F.: Quantitative compari-  
726 son of direct phase retrieval algorithms in in-line phase tomography. *Medi-  
727 cal Physics* **35**(10), 4556–4566 (2008). <https://doi.org/10.1118/1.2975224>.  
728 \_eprint: <https://onlinelibrary.wiley.com/doi/pdf/10.1118/1.2975224>

729 [40] Huhn, S., Lohse, L.M., Lucht, J., Salditt, T.: Fast algorithms  
730 for nonlinear and constrained phase retrieval in near-field X-  
731 ray holography based on Tikhonov regularization. Technical Report  
732 arXiv:2205.01099, arXiv (May 2022). [https://doi.org/10.48550/arXiv.](https://doi.org/10.48550/arXiv.2205.01099)  
733 [2205.01099](https://doi.org/10.48550/arXiv.2205.01099). arXiv:2205.01099 [physics] type: article

734 [41] Yu, B., Weber, L., Pacureanu, A., Langer, M., Olivier, C., Cloetens,  
735 P., Peyrin, F.: Evaluation of phase retrieval approaches in magnified  
736 X-ray phase nano computerized tomography applied to bone tissue.  
737 *Optics Express* **26**(9), 11110–11124 (2018). [https://doi.org/10.1364/OE.](https://doi.org/10.1364/OE.26.011110)  
738 [26.011110](https://doi.org/10.1364/OE.26.011110). Publisher: Optica Publishing Group

739 [42] Feldkamp, L.A., Davis, L.C., Kress, J.W.: Practical cone-beam algorithm.  
740 *Journal of the Optical Society of America A* **1**(6), 612 (1984). <https://doi.org/10.1364/JOSAA.1.000612>  
741

742 [43] van Aarle, W., Palenstijn, W.J., De Beenhouwer, J., Altantzis, T.,  
743 Bals, S., Batenburg, K.J., Sijbers, J.: The ASTRA Toolbox: A platform  
744 for advanced algorithm development in electron tomography. *Ultrami-  
745 croscopy* **157**, 35–47 (2015). [https://doi.org/10.1016/j.ultramic.2015.05.](https://doi.org/10.1016/j.ultramic.2015.05.002)  
746 [002](https://doi.org/10.1016/j.ultramic.2015.05.002)

747 [44] Boergens, K.M., Berning, M., Bocklisch, T., Bräunlein, D., Drawitsch,  
748 F., Frohnhofen, J., Herold, T., Otto, P., Rzepka, N., Werkmeister, T.,  
749 Werner, D., Wiese, G., Wissler, H., Helmstaedter, M.: webKnossos: effi-  
750 cient online 3D data annotation for connectomics. *Nature Methods* **14**(7),  
751 691–694 (2017). <https://doi.org/10.1038/nmeth.4331>. Publisher: Nature

752 Publishing Group. Accessed 2024-03-22

753 [45] Schindelin, J., Arganda-Carreras, I., Frise, E., Kaynig, V., Longair, M.,  
754 Pietzsch, T., Preibisch, S., Rueden, C., Saalfeld, S., Schmid, B., Tin-  
755 evez, J.-Y., White, D.J., Hartenstein, V., Eliceiri, K., Tomancak, P.,  
756 Cardona, A.: Fiji: an open-source platform for biological-image analysis.  
757 *Nature Methods* **9**(7), 676–682 (2012). [https://doi.org/10.1038/nmeth.](https://doi.org/10.1038/nmeth.2019)  
758 [2019](https://doi.org/10.1038/nmeth.2019). Number: 7 Publisher: Nature Publishing Group
